# Supplementary material for: Genome-wide association study of suicide attempt in a Mexican population: a study protocol
Source: PubMed Central journal article supplement — BMJ Open. 2019 Apr 11;9(4):e025335. doi: 10.1136/bmjopen-2018-025335 (PMC6500275; doi:10.1136/bmjopen-2018-025335), 2019-04-11
Supplement: bmjopen-2018-025335.draft_revisions.pdf [file bmjopen-2018-025335.draft_revisions.pdf]

# BMJ Open

BMJ Open is committed to open peer review. As part of this commitment we make the peer review history of every article we publish publicly available.

When an article is published we post the peer reviewers' comments and the authors' responses online. We also post the versions of the paper that were used during peer review. These are the versions that the peer review comments apply to.

The versions of the paper that follow are the versions that were submitted during the peer review process. They are not the versions of record or the final published versions. They should not be cited or distributed as the published version of this manuscript.

BMJ Open is an open access journal and the full, final, typeset and author-corrected version of record of the manuscript is available on our site with no access controls, subscription charges or pay-per-view fees (<http://bmjopen.bmj.com>).

If you have any questions on BMJ Open's open peer review process please email [info.bmjopen@bmj.com](mailto:info.bmjopen@bmj.com)

# BMJ Open

## Genome-wide association study of suicide behavior in psychiatric disorders: A protocol in Mexican population

|                               |                                                                                                                                                                                                                                                                                                                                                                                                                                                                                                                                                                                                                                                                                                                                                                                                                                                                                                                                                                                                              |
|-------------------------------|--------------------------------------------------------------------------------------------------------------------------------------------------------------------------------------------------------------------------------------------------------------------------------------------------------------------------------------------------------------------------------------------------------------------------------------------------------------------------------------------------------------------------------------------------------------------------------------------------------------------------------------------------------------------------------------------------------------------------------------------------------------------------------------------------------------------------------------------------------------------------------------------------------------------------------------------------------------------------------------------------------------|
| Journal:                      | <i>BMJ Open</i>                                                                                                                                                                                                                                                                                                                                                                                                                                                                                                                                                                                                                                                                                                                                                                                                                                                                                                                                                                                              |
| Manuscript ID                 | bmjopen-2018-025335                                                                                                                                                                                                                                                                                                                                                                                                                                                                                                                                                                                                                                                                                                                                                                                                                                                                                                                                                                                          |
| Article Type:                 | Protocol                                                                                                                                                                                                                                                                                                                                                                                                                                                                                                                                                                                                                                                                                                                                                                                                                                                                                                                                                                                                     |
| Date Submitted by the Author: | 10-Jul-2018                                                                                                                                                                                                                                                                                                                                                                                                                                                                                                                                                                                                                                                                                                                                                                                                                                                                                                                                                                                                  |
| Complete List of Authors:     | González-Castro, Thelma; Universidad Juárez Autónoma de Tabasco, División Académica Multidisciplinaria de Jalpa de Méndez<br>Tovilla-Zárate, Carlos; Universidad Juárez Autónoma de Tabasco, División Multidisciplinaria de Comalcalco, División Académica Multidisciplinaria de Comalcalco<br>Martínez Magaña, José Jaime; Instituto Nacional de Medicina Genómica, Laboratorio de Genómica de Enfermedades Psiquiátrica y Neurodegenerativas; Universidad Juárez Autónoma de Tabasco, División Académica de Ciencias de la Salud<br>Juárez-Rojop, Isela; Universidad Juárez Autónoma de Tabasco, División Académica de Ciencias de la Salud<br>Sarmiento, Emmanuel; Hospital Psiquiátrico Infantil Ramon de la Fuente<br>Genis-Mendoza, Alma; Instituto Nacional de Medicina Genómica, Laboratorio de Genómica de Enfermedades Psiquiátrica y Neurodegenerativas<br>Nicolini, Humberto; Instituto Nacional de Medicina Genómica, Laboratorio de Genómica de Enfermedades Psiquiátrica y Neurodegenerativas |
| Keywords:                     | Suicide & self-harm < PSYCHIATRY, MENTAL HEALTH, Schizophrenia & psychotic disorders < PSYCHIATRY, GENETICS                                                                                                                                                                                                                                                                                                                                                                                                                                                                                                                                                                                                                                                                                                                                                                                                                                                                                                  |
|                               |                                                                                                                                                                                                                                                                                                                                                                                                                                                                                                                                                                                                                                                                                                                                                                                                                                                                                                                                                                                                              |

SCHOLARONE™  
Manuscripts

## Genome-wide association study of suicide behavior in psychiatric disorders: A protocol in Mexican population

Thelma Beatriz González Castro<sup>1a</sup>, Carlos Alfonso Tovilla-Zarate<sup>2a</sup>, José Jaime Martínez-Magaña<sup>3</sup>, Isela Esther Juárez-Rojop<sup>4</sup>, Emmanuel Sarmiento<sup>5</sup>, Alma Delia Genis-Mendoza<sup>\*3,5</sup>, Humberto Nicolini<sup>\*3</sup>

<sup>1</sup> División Académica Multidisciplinaria de Jalpa de Méndez; Universidad Juárez Autónoma de Tabasco. Jalpa de Méndez, Tabasco, México.

<sup>2</sup> División Académica Multidisciplinaria de Comalcalco; Universidad Juárez Autónoma de Tabasco. Comalcalco, Tabasco, México.

<sup>3</sup> Instituto Nacional de Medicina Genómica (INMEGEN); Secretaria de Salud. Ciudad de México.

<sup>4</sup> División Académica Multidisciplinaria de Ciencias de la Salud; Universidad Juárez Autónoma de Tabasco. Villahermosa, Tabasco, México.

<sup>5</sup> Hospital Psiquiátrico Infantil "Dr. Juan N. Navarro". Ciudad de México

<sup>a</sup> these authors contributed equally to this work

TBGC: [thelma.glez.castro@gmail.com](mailto:thelma.glez.castro@gmail.com); CATZ: [alfonso\\_tovillaz@yahoo.com.mx](mailto:alfonso_tovillaz@yahoo.com.mx); JJMM: [jimy.10.06@gmail.com](mailto:jimy.10.06@gmail.com); IEJR: [iselajuarezrojop@hotmail.com](mailto:iselajuarezrojop@hotmail.com); ES: [emmanuelarmientoh@hotmail.com](mailto:emmanuelarmientoh@hotmail.com)

\*Correspondence authors: Ph.D. Alma Genis-Mendoza, National Institute of Genomic Medicine (INMEGEN), Psychiatric Care Services (SAP). Periférico Sur 4809, Arenal Tepepan, 14610, Mexico City, Mexico. Phone + 55 5350 1900. Email address: [adgenis@inmegen.gob.mx](mailto:adgenis@inmegen.gob.mx) or Humberto Nicolini: [hnicolini@inmegen.gob.mx](mailto:hnicolini@inmegen.gob.mx)

Word account: 1,850

## Abstract

*Introduction:* Suicidality is a complex behavior and major health problem, in which the specific features that could predispose to suicidal behavior have been extensively investigated most frequently in Europeans and Asians. Due to this, our aim is to present a protocol that will explore the suicide attempt in psychiatric disorders by performing a genome-wide association study in a Mexican population.

*Method and analysis:* 700 Mexican cases diagnosed as schizophrenics with or without a suicide attempt and bipolar with or without a suicide attempt; also suicide attempters without psychiatric comorbidity will be analyzed. The genotyping will be performed using the Infinium PsychArray BeadChip, following the manufacturer's protocol.

*Ethics and dissemination:* This type of genetic tools will allow us to identify the associated SNPs in mental illnesses such as schizophrenia and bipolar disorder and their possible participation as predictors of suicidal behavior in a Mexican population, so the outcomes of the study derived of the current protocol are essential data to get a better comprehension of SB. This study has been approved by the ethics and investigation commitments of the National Institute of Genomic Medicine

*Trial registration:* CEI 215/13

**Keywords:** suicide & self-harm; mental health; schizophrenia & psychotic disorders; genetics

## Article summary

### Strengths and limitations of this study

Our results would be the first report in a Mexican population to perform a GWAS in association with suicide.

These outcomes would allow identifying candidate variants for schizophrenia and bipolar disorder in Mexico as predictors for SB.

Mexican population has a heterogeneous genetic background, which could interfere in the interpretation of the results.

The findings would provide helpful information, so that in the future the Latin population could be considered in the design of microarrays.

## Introduction

Suicide is one of the leading causes of death worldwide. Individuals diagnosed with a psychiatric disorder have higher rates of suicide compared to the general population, which emphasizes a narrow relationship between suicide and psychiatric disorders. In this line of evidence, a considerable majority of suicide victims have had an undiagnosed psychiatric disorder at the time of death<sup>1-3</sup>. Furthermore, several studies consider psychiatric disorders as one of the main risk factors of suicide. Unfortunately, up to today, the mechanisms that explain this relationship have not been fully disentangled<sup>4 5</sup>.

Suicidal behavior (SB), has been defined as a complex issue that results from the combination of genetic variants, along with personal experiences and environmental contribution; altogether, these factors establish the disease symptomatology manifestation [1, 3, 12]. The results of studies based on twins, adoptions and families, support the heritability of SB, pinpointing a genetic background<sup>6-9</sup>. Subsequently, many candidate-gene association studies have been performed, with the different phenotypes of SB: suicide attempts, suicide ideation and accomplished suicide<sup>1 3 10-12</sup>. Unfortunately, SB is a polygenic trait and candidate-gene association studies underestimate the genetic background. In an attempt to search for this polygenic variation of SB, other strategies have been developed, such as the genome-wide association studies (GWAS)<sup>12-14</sup>.

Over the past decade, a small number of GWAS, exploring common genetic variation mostly in suicide attempters have found significant associations between genetic components and SB, establishing possible molecular pathways involved in

1  
2  
3 the susceptibility of the disease<sup>15 16</sup>. However, even if a genetic diathesis model for  
4  
5 predisposition to SB has been proposed and GWAS have suggest candidate loci or  
6  
7 pathways, the only information published available comes from studies analyzing  
8  
9 Caucasians or Asians populations, leaving behind Latin American populations  
10  
11 including Mexicans<sup>17-21</sup>. Therefore, more studies are necessary in order to have a  
12  
13 better comprehension of the genetic background of SB.  
14  
15

## 16 17 Objective

18  
19  
20 Our aim is to present a protocol for the first genome-wide association study  
21  
22 of suicide attempters in a Mexican population, in order to explore and define the  
23  
24 involvement of a genetic diathesis that predispose to SB in Mexicans.  
25  
26

## 27 28 **Methods and analysis**

### 29 30 *Sample population and setting*

31  
32  
33 The study will include 700 Mexican cases diagnosed as schizophrenics with  
34  
35 or without a suicide attempt and bipolar with or without a suicide attempt; also  
36  
37 suicide attempters without psychiatric comorbidity; using Structured Clinical  
38  
39 Interview for DSM-IV (SCID-I and II). All patients, will be recruited from three  
40  
41 clinical centers (“Dr. Gustavo A. Rovirosa” General Hospital, “Dr. Desiderio G.  
42  
43 Carbajal Regional Hospital in Tabasco, Mexico and “Dr. Juan N. Navarro”  
44  
45 Psychiatric Hospital in Mexico City). A group of 500 healthy volunteers without any  
46  
47 history of psychiatric disorders will be randomly selected as a control group. All  
48  
49 individuals will be Mexican with Mexican ancestry at least up to two generations  
50  
51  
52  
53  
54  
55  
56  
57  
58  
59  
60

1  
2  
3 (Mexican grandparents); they will be recruited from several Mexican hospitals and  
4  
5 outpatient clinics.  
6  
7

### 8 *Ethical approval*

9

10  
11 A written informed consent will be obtained from all patients who accept to  
12  
13 participate. The study will be performed in accordance with the Helsinki declaration  
14  
15 (59th General Assembly, Seoul, Korea, October 2008). This study has been  
16  
17 approved by the ethics and investigation commitments of the National Institute of  
18  
19 Genomic Medicine on July 22<sup>nd</sup> 2015, No. CEI 215/13  
20  
21  
22

### 23 *Clinical assessment*

24

25  
26 The diagnoses and clinical evaluations will be performed by at least two  
27  
28 trained senior psychiatrists of whom at least one of them would have personally  
29  
30 examined the patient. All the subjects included in the study will participate in semi-  
31  
32 structured interviews that will include life-time and family history of suicidal  
33  
34 behavior, among other clinical features. Subsequently, the sample will be stratified  
35  
36 as follows: schizophrenics with and without suicide attempt, bipolar with and  
37  
38 without suicide attempt, only suicide attempters and finally, healthy subjects as  
39  
40 controls. The suicide attempt will be defined as a self-injurious act that had at least  
41  
42 a partial intent to end one's life; the number of attempts, method used and medical  
43  
44 damage of past suicide attempts will be recorded.  
45  
46  
47  
48

### 49 *Genotyping*

50

51  
52  
53 The DNA will be isolated from peripheral blood leukocytes samples using a  
54  
55 standardized protocol of the Genomic Wizard Purification Kit from Promega, as  
56  
57  
58  
59



1  
2  
3 previously reported <sup>22-24</sup>. The integrity of genetic material will be checked on 1%  
4  
5 agarose gels and quantified by spectrophotometry using Nanodrop system.  
6  
7

8 The genotyping will be performed using the Infinium PsychArray BeadChip,  
9  
10 following the manufacturer's protocol <sup>25 26</sup>. This array contains approximately  
11  
12 580000 genetic variants, wherein include a set of genetic variants previously  
13  
14 associated with a variety of psychiatric illnesses. All genotyping analyses will be  
15  
16 performed at the National Institute of Genomic Medicine (INMEGEN). For quality  
17  
18 controls, we will filter-out samples and variants with call rates lower than 98% and  
19  
20 variants deviating from Hardy-Weinberg equilibrium, with a chi-square p-value <  
21  
22  $1 \times 10^{-6}$ . The concordance between gender will be performed based on the  
23  
24 heterozygosity of the X and Y chromosomes. All the filtering processes will be  
25  
26 performed using the PLINK v1.9 software <sup>27</sup>. After the quality control procedures,  
27  
28 we will impute variants on autosome chromosomes, with Beagle software <sup>28</sup>; during  
29  
30 the imputation process, we will use 1000 genomes phase 3 database as  
31  
32 references.  
33  
34  
35  
36  
37  
38

### 39 *Statistical analyses*

40  
41  
42 In order to evaluate the effect of genetic variants on suicidal behavior, we  
43  
44 will perform two different workflows: A) a classic GWAS analysis applying the same  
45  
46 weight to all the variants and B) an algorithm with prediction of deleteriousness of  
47  
48 the variants. Concerning the first workflow, we will conduct a mixed linear model  
49  
50 analysis on imputed variants with a minor allele frequency of 5%, adjusting the  
51  
52 models with the Genetic Relationship Matrix, age and gender. The implementation  
53  
54 of the linear mixed models will be performed on the GCTA software <sup>29</sup>. For the  
55  
56  
57  
58  
59  
60

1  
2  
3 second workflow, will include a prediction of the deliriousness of the variants using  
4 different prediction algorithms, such as PolyPhen, SIFT, CADD, VEP and  
5 ENCODE<sup>30-34</sup>. After the prediction of the functional impact of the variants, we will  
6  
7 compare the cases allele frequency of loss-of-function, missense with deleterious  
8 effect, variants present in regulatory regions and variants with a PHRED-CADD  
9 score higher than 20, with the allele frequency of the populations reported in the  
10 1000 genomes and ExAC database.  
11  
12  
13  
14  
15  
16  
17  
18

## 19 **Discussion**

20  
21  
22 Various situations and contexts have been proposed as predictors of  
23 suicidal behavior; among them, the presence of a psychiatric disorder seems to be  
24 an important determinant for such behavior. Likewise, the possible predisposition  
25 of a genetic background to manifest SB has been supported by several  
26 investigations, but the understanding of the precise genetic system that causes  
27 such vulnerability to suicidal tendencies is still largely incomplete. Hence, the  
28 principal aim of our protocol study is to explore the potential genetic influence over  
29 SB in a Mexican population, throughout a genome-wide association study. In  
30 addition, we want to emphasize that to our knowledge, this study protocol will be  
31 the first one to evaluate suicidal behavior in schizophrenic and bipolar disorder  
32 patients, in a Mexican population.  
33  
34  
35  
36  
37  
38  
39  
40  
41  
42  
43  
44  
45  
46  
47

48  
49 The majority of the genetic epidemiology evidence suggest that suicidal  
50 behavior is a complex issue, where there are multiple genes that have a small  
51 effect over SB, but if combined, could become predisposing factors; therefore,  
52 association studies that detect small effect contributions can be more useful, which  
53  
54  
55  
56  
57  
58  
59  
60

1  
2  
3 is a strength of this protocol. In this sense, one of the most powerful strengths of  
4  
5 the GWAS is that uses many genetic markers across the whole genome to analyze  
6  
7 for associations with a particular disease; as it is based on no prior assumptions, it  
8  
9 explores a large number of genetic variants. For these reasons, we will use a  
10  
11 GWAS to explore the genetic influence over suicidal behavior in schizophrenics  
12  
13 with and without SA, bipolar patients with and without SA, suicide attempters and  
14  
15 healthy subjects as controls. Therefore, the results of this study will provide  
16  
17 information to better comprehend the influence of the genetic background in the  
18  
19 development of suicidal behavior, among psychiatric patients.  
20  
21  
22

23  
24 Additionally, the findings of the present research could provide valuable information  
25  
26 for future researches that attempt to identify genetic risk factors for suicidal  
27  
28 behavior, and help detect and/or treat this disease. Nowadays, there are  
29  
30 microarrays that have been used to study several genetic variables in Caucasians  
31  
32 and Asians; but to our knowledge, there is no evidence reported of GWAS in  
33  
34 studies that evaluate suicidal behavior in psychiatric patients. Therefore, the  
35  
36 outcomes of the study derived of the current protocol, could provide essential  
37  
38 information, because the use of this type of genetic tools will allow us to identify the  
39  
40 associated SNPs, missense and insertions and indels in mental illnesses such as  
41  
42 schizophrenia and bipolar disorder and their possible participation as predictors of  
43  
44 suicidal behavior in a Mexican population. Consequently, these findings could give  
45  
46 important information to improve the design of future chips for molecular diagnosis  
47  
48 of psychiatric disorders in Mexicans, which will be very useful in the prevention,  
49  
50 diagnosis and prognosis of suicidal behavior in Mexico.  
51  
52  
53  
54  
55  
56  
57  
58  
59  
60

1  
2  
3 In conclusion, the completion of the present protocol could impulse the  
4 design of a microarray that includes associated variants to SB in Mexican  
5 population. Moreover, the findings will give a better perspective of the participation  
6 of the genetic background as a predictor of suicidal behavior in psychiatric  
7 diseases. Hence, the outcomes would be useful in genetic research, as well as in  
8 prevention and early diagnosis of suicidal behavior in Mexicans.  
9  
10  
11  
12  
13  
14  
15  
16  
17  
18  
19  
20  
21  
22  
23  
24  
25  
26  
27  
28  
29  
30  
31  
32  
33  
34  
35  
36  
37  
38  
39  
40  
41  
42  
43  
44  
45  
46  
47  
48  
49  
50  
51  
52  
53  
54  
55  
56  
57  
58  
59  
60

**Ethics and disseminations:**

The study will be conducted in compliance with local regulations and internationally established principles of the Declaration of Helsinki (59th General Assembly, Seoul, Korea, October 2008). This study has been approved by the ethics and investigation commitments of the National Institute of Genomic Medicine on July 22nd 2015, No. CEI 215/13. Before inclusion, all patients are required to sign an informed consent form

**Consent for publication:**

Not applicable

**Availability of data and material:**

Not applicable

**Competing interests statement:**

The authors declare that they have no competing interests.

**Funding:**

This protocol will receive the support of INMEGEN project number 23/2015/I via Humberto Nicolini.

**Author contributions:**

AGM, HN and JJMM conceived the study, participated in its design, helped to draft the manuscript and mentored TBGC. CATZ, AGM and JJMM critically revised successive drafts of the manuscript and provided important intellectual input. CATZ

1  
2  
3 and TBGC coordinated and supervised the integration of the manuscript. All  
4  
5 authors read and approved the final manuscript.  
6  
7

## 8 **Acknowledgements** 9

10  
11 The protocol study will be a doctoral thesis of TBGC.  
12  
13  
14  
15  
16  
17  
18  
19  
20  
21  
22  
23  
24  
25  
26  
27  
28  
29  
30  
31  
32  
33  
34  
35  
36  
37  
38  
39  
40  
41  
42  
43  
44  
45  
46  
47  
48  
49  
50  
51  
52  
53  
54  
55  
56  
57  
58  
59  
60

## References

1. Perlis RH, Huang J, Purcell S, et al. Genome-wide association study of suicide attempts in mood disorder patients. *The American journal of psychiatry* 2010;167(12):1499-507. doi: 10.1176/appi.ajp.2010.10040541 [published Online First: 2010/11/03]
2. Pulay AJ, Rethelyi JM. Multimarker analysis suggests the involvement of BDNF signaling and microRNA biosynthesis in suicidal behavior. *American journal of medical genetics Part B, Neuropsychiatric genetics : the official publication of the International Society of Psychiatric Genetics* 2016;171(6):763-76. doi: 10.1002/ajmg.b.32433 [published Online First: 2016/02/28]
3. Mullins N, Perroud N, Uher R, et al. Genetic relationships between suicide attempts, suicidal ideation and major psychiatric disorders: a genome-wide association and polygenic scoring study. *American journal of medical genetics Part B, Neuropsychiatric genetics : the official publication of the International Society of Psychiatric Genetics* 2014;165B(5):428-37. doi: 10.1002/ajmg.b.32247 [published Online First: 2014/06/26]
4. Perroud N, Uher R, Ng MY, et al. Genome-wide association study of increasing suicidal ideation during antidepressant treatment in the GENDEP project. *Pharmacogenomics J* 2012;12(1):68-77. doi: 10.1038/tpj.2010.70 [published Online First: 2010/09/30]
5. Stein MB, Ware EB, Mitchell C, et al. Genomewide association studies of suicide attempts in US soldiers. *American journal of medical genetics Part B, Neuropsychiatric genetics : the official publication of the International Society of Psychiatric Genetics* 2017;174(8):786-97. doi: 10.1002/ajmg.b.32594 [published Online First: 2017/09/14]
6. Levine SZ, Goldberg Y, Yoffe R, et al. Suicide attempts in a national population of twins concordant for psychoses. *European neuropsychopharmacology : the journal of the European College of Neuropsychopharmacology* 2014;24(8):1203-9. doi: 10.1016/j.euroneuro.2014.05.014 [published Online First: 2014/06/28]
7. Linker J, Gillespie NA, Maes H, et al. Suicidal ideation, depression, and conduct disorder in a sample of adolescent and young adult twins. *Suicide & life-threatening behavior* 2012;42(4):426-36. doi: 10.1111/j.1943-278X.2012.00101.x [published Online First: 2012/06/01]
8. Petersen L, Sorensen TI, Kragh Andersen P, et al. Genetic and familial environmental effects on suicide attempts: a study of Danish adoptees and their biological and adoptive siblings. *Journal of affective disorders* 2014;155:273-7. doi: 10.1016/j.jad.2013.11.012 [published Online First: 2013/12/05]
9. Roy A, Rylander G, Sarchiapone M. Genetics of suicides. Family studies and molecular genetics. *Annals of the New York Academy of Sciences* 1997;836:135-57. [published Online First: 1998/06/09]
10. Mirkovic B, Cohen D, Laurent C, et al. A case-control association study of 12 candidate genes and attempted suicide in French adolescents. *International journal of adolescent medicine and health* 2017 doi: 10.1515/ijamh-2017-0089 [published Online First: 2017/09/14]
11. Tombacz D, Maroti Z, Kalmar T, et al. High-Coverage Whole-Exome Sequencing Identifies Candidate Genes for Suicide in Victims with Major Depressive Disorder. *Scientific reports* 2017;7(1):7106. doi: 10.1038/s41598-017-06522-3 [published Online First: 2017/08/05]
12. Sokolowski M, Wasserman J, Wasserman D. Rare CNVs in Suicide Attempt include Schizophrenia-Associated Loci and Neurodevelopmental Genes: A Pilot Genome-Wide and Family-Based Study. *PLoS one* 2016;11(12):e0168531. doi: 10.1371/journal.pone.0168531 [published Online First: 2016/12/29]

13. Gross JA, Bureau A, Croteau J, et al. A genome-wide copy number variant study of suicidal behavior. *PloS one* 2015;10(5):e0128369. doi: 10.1371/journal.pone.0128369 [published Online First: 2015/05/27]
14. Galfalvy H, Haghighi F, Hodgkinson C, et al. A genome-wide association study of suicidal behavior. *American journal of medical genetics Part B, Neuropsychiatric genetics : the official publication of the International Society of Psychiatric Genetics* 2015;168(7):557-63. doi: 10.1002/ajmg.b.32330 [published Online First: 2015/06/17]
15. Galfalvy H, Zalsman G, Huang YY, et al. A pilot genome wide association and gene expression array study of suicide with and without major depression. *The world journal of biological psychiatry : the official journal of the World Federation of Societies of Biological Psychiatry* 2013;14(8):574-82. doi: 10.3109/15622975.2011.597875 [published Online First: 2011/11/09]
16. Laje G, Allen AS, Akula N, et al. Genome-wide association study of suicidal ideation emerging during citalopram treatment of depressed outpatients. *Pharmacogenet Genomics* 2009;19(9):666-74. doi: 10.1097/FPC.0b013e32832e4bcd [published Online First: 2009/09/03]
17. Zai CC, Goncalves VF, Tiwari AK, et al. A genome-wide association study of suicide severity scores in bipolar disorder. *Journal of psychiatric research* 2015;65:23-9. doi: 10.1016/j.jpsychires.2014.11.002 [published Online First: 2015/04/29]
18. Menke A, Domschke K, Czamara D, et al. Genome-wide association study of antidepressant treatment-emergent suicidal ideation. *Neuropsychopharmacology : official publication of the American College of Neuropsychopharmacology* 2012;37(3):797-807. doi: 10.1038/npp.2011.257 [published Online First: 2011/10/28]
19. Bani-Fatemi A, Graff A, Zai C, et al. GWAS analysis of suicide attempt in schizophrenia: Main genetic effect and interaction with early life trauma. *Neurosci Lett* 2016;622:102-6. doi: 10.1016/j.neulet.2016.04.043 [published Online First: 2016/04/26]
20. Schosser A, Butler AW, Ising M, et al. Genomewide association scan of suicidal thoughts and behaviour in major depression. *PloS one* 2011;6(7):e20690. doi: 10.1371/journal.pone.0020690 [published Online First: 2011/07/14]
21. Willour VL, Seifuddin F, Mahon PB, et al. A genome-wide association study of attempted suicide. *Molecular psychiatry* 2012;17(4):433-44. doi: 10.1038/mp.2011.4 [published Online First: 2011/03/23]
22. Gonzalez-Castro TB, Nicolini H, Lanzagorta N, et al. The role of brain-derived neurotrophic factor (BDNF) Val66Met genetic polymorphism in bipolar disorder: a case-control study, comorbidities, and meta-analysis of 16,786 subjects. *Bipolar disorders* 2015;17(1):27-38. doi: 10.1111/bdi.12227 [published Online First: 2014/07/22]
23. Gonzalez-Castro TB, Tovilla-Zarate C, Juarez-Rojop I, et al. Association of the 5HTR2A gene with suicidal behavior: case-control study and updated meta-analysis. *BMC psychiatry* 2013;13:25. doi: 10.1186/1471-244x-13-25 [published Online First: 2013/01/15]
24. Gonzalez-Castro TB, Tovilla-Zarate CA, Juarez-Rojop I, et al. Association of 5HTR1A gene variants with suicidal behavior: case-control study and updated meta-analysis. *Journal of psychiatric research* 2013;47(11):1665-72. doi: 10.1016/j.jpsychires.2013.04.011 [published Online First: 2013/08/06]
25. Guo Y, He J, Zhao S, et al. Illumina human exome genotyping array clustering and quality control. *Nature protocols* 2014;9(11):2643-62. doi: 10.1038/nprot.2014.174 [published Online First: 2014/10/17]
26. Borges G, Orozco R, Medina Mora ME. [Risk index for attempted suicide in Mexico]. *Salud publica de Mexico* 2012;54(6):595-606. [published Online First: 2013/01/16]



- 1  
2  
3 27. Chang CC, Chow CC, Tellier LC, et al. Second-generation PLINK: rising to the challenge of larger  
4 and richer datasets. *GigaScience* 2015;4:7. doi: 10.1186/s13742-015-0047-8 [published  
5 Online First: 2015/02/28]  
6  
7 28. Browning BL, Browning SR. Genotype Imputation with Millions of Reference Samples. *Am J*  
8 *Hum Genet* 2016;98(1):116-26. doi: 10.1016/j.ajhg.2015.11.020 [published Online First:  
9 2016/01/11]  
10  
11 29. Yang J, Lee SH, Goddard ME, et al. Genome-wide complex trait analysis (GCTA): methods, data  
12 analyses, and interpretations. *Methods in molecular biology (Clifton, NJ)* 2013;1019:215-  
13 36. doi: 10.1007/978-1-62703-447-0\_9 [published Online First: 2013/06/13]  
14  
15 30. Adzhubei I, Jordan DM, Sunyaev SR. Predicting functional effect of human missense mutations  
16 using PolyPhen-2. *Current protocols in human genetics* 2013;Chapter 7:Unit7.20. doi:  
17 10.1002/0471142905.hg0720s76 [published Online First: 2013/01/15]  
18  
19 31. Ng PC, Henikoff S. Predicting deleterious amino acid substitutions. *Genome research*  
20 2001;11(5):863-74. doi: 10.1101/gr.176601 [published Online First: 2001/05/05]  
21  
22 32. McLaren W, Gil L, Hunt SE, et al. The Ensembl Variant Effect Predictor. *Genome biology*  
23 2016;17(1):122. doi: 10.1186/s13059-016-0974-4 [published Online First: 2016/06/09]  
24  
25 33. An integrated encyclopedia of DNA elements in the human genome. *Nature*  
26 2012;489(7414):57-74. doi: 10.1038/nature11247 [published Online First: 2012/09/08]  
27  
28 34. Kircher M, Witten DM, Jain P, et al. A general framework for estimating the relative  
29 pathogenicity of human genetic variants. 2014;46(3):310-5. doi: 10.1038/ng.2892  
30  
31  
32  
33  
34  
35  
36  
37  
38  
39  
40  
41  
42  
43  
44  
45  
46  
47  
48  
49  
50  
51  
52  
53  
54  
55  
56  
57  
58  
59  
60

STROBE Statement—Checklist of items that should be included in reports of *case-control studies*

|                              | Item No | Recommendation                                                                                                                                                                                    | Page |
|------------------------------|---------|---------------------------------------------------------------------------------------------------------------------------------------------------------------------------------------------------|------|
| <b>Title and abstract</b>    | 1       | (a) Indicate the study's design with a commonly used term in the title or the abstract                                                                                                            | 1-2  |
|                              |         | (b) Provide in the abstract an informative and balanced summary of what was done and what was found                                                                                               | 2    |
| <b>Introduction</b>          |         |                                                                                                                                                                                                   |      |
| Background/rationale         | 2       | Explain the scientific background and rationale for the investigation being reported                                                                                                              | 4    |
| Objectives                   | 3       | State specific objectives, including any prespecified hypotheses                                                                                                                                  | 5    |
| <b>Methods</b>               |         |                                                                                                                                                                                                   |      |
| Study design                 | 4       | Present key elements of study design early in the paper                                                                                                                                           | 5    |
| Setting                      | 5       | Describe the setting, locations, and relevant dates, including periods of recruitment, exposure, follow-up, and data collection                                                                   | 5-6  |
| Participants                 | 6       | (a) Give the eligibility criteria, and the sources and methods of case ascertainment and control selection. Give the rationale for the choice of cases and controls                               | 6-7  |
|                              |         | (b) For matched studies, give matching criteria and the number of controls per case                                                                                                               | 6-7  |
| Variables                    | 7       | Clearly define all outcomes, exposures, predictors, potential confounders, and effect modifiers. Give diagnostic criteria, if applicable                                                          | 5-6  |
| Data sources/<br>measurement | 8*      | For each variable of interest, give sources of data and details of methods of assessment (measurement). Describe comparability of assessment methods if there is more than one group              | 7-8  |
| Bias                         | 9       | Describe any efforts to address potential sources of bias                                                                                                                                         | N/A  |
| Study size                   | 10      | Explain how the study size was arrived at                                                                                                                                                         | 7-8  |
| Quantitative variables       | 11      | Explain how quantitative variables were handled in the analyses. If applicable, describe which groupings were chosen and why                                                                      | 7    |
| Statistical methods          | 12      | (a) Describe all statistical methods, including those used to control for confounding                                                                                                             | 7    |
|                              |         | (b) Describe any methods used to examine subgroups and interactions                                                                                                                               | 7-8  |
|                              |         | (c) Explain how missing data were addressed                                                                                                                                                       | N/A  |
|                              |         | (d) If applicable, explain how matching of cases and controls was addressed                                                                                                                       | N/A  |
|                              |         | (e) Describe any sensitivity analyses                                                                                                                                                             | N/A  |
| <b>Results</b>               |         |                                                                                                                                                                                                   |      |
| Participants                 | 13*     | (a) Report numbers of individuals at each stage of study—eg numbers potentially eligible, examined for eligibility, confirmed eligible, included in the study, completing follow-up, and analysed | N/A  |
|                              |         | (b) Give reasons for non-participation at each stage                                                                                                                                              | N/A  |
|                              |         | (c) Consider use of a flow diagram                                                                                                                                                                | N/A  |
| Descriptive data             | 14*     | (a) Give characteristics of study participants (eg demographic, clinical, social) and information on exposures and potential confounders                                                          | N/A  |
|                              |         | (b) Indicate number of participants with missing data for each variable of interest                                                                                                               | N/A  |
| Outcome data                 | 15*     | Report numbers in each exposure category, or summary measures of exposure                                                                                                                         | N/A  |

|    |              |    |                                                                                     |
|----|--------------|----|-------------------------------------------------------------------------------------|
| 1  |              |    |                                                                                     |
| 2  | Main results | 16 | (a) Give unadjusted estimates and, if applicable, confounder-adjusted               |
| 3  |              |    | estimates and their precision (eg, 95% confidence interval). Make clear             |
| 4  |              |    | which confounders were adjusted for and why they were included                      |
| 5  |              |    | (b) Report category boundaries when continuous variables were categorized           |
| 6  |              |    | (c) If relevant, consider translating estimates of relative risk into absolute risk |
| 7  |              |    | for a meaningful time period                                                        |
| 8  |              |    | N/A                                                                                 |
| 9  |              |    |                                                                                     |
| 10 |              |    |                                                                                     |
| 11 |              |    |                                                                                     |
| 12 |              |    |                                                                                     |
| 13 |              |    |                                                                                     |
| 14 |              |    |                                                                                     |
| 15 |              |    |                                                                                     |
| 16 |              |    |                                                                                     |
| 17 |              |    |                                                                                     |
| 18 |              |    |                                                                                     |
| 19 |              |    |                                                                                     |
| 20 |              |    |                                                                                     |
| 21 |              |    |                                                                                     |
| 22 |              |    |                                                                                     |
| 23 |              |    |                                                                                     |
| 24 |              |    |                                                                                     |
| 25 |              |    |                                                                                     |
| 26 |              |    |                                                                                     |
| 27 |              |    |                                                                                     |
| 28 |              |    |                                                                                     |
| 29 |              |    |                                                                                     |
| 30 |              |    |                                                                                     |
| 31 |              |    |                                                                                     |
| 32 |              |    |                                                                                     |
| 33 |              |    |                                                                                     |
| 34 |              |    |                                                                                     |
| 35 |              |    |                                                                                     |
| 36 |              |    |                                                                                     |
| 37 |              |    |                                                                                     |
| 38 |              |    |                                                                                     |
| 39 |              |    |                                                                                     |
| 40 |              |    |                                                                                     |
| 41 |              |    |                                                                                     |
| 42 |              |    |                                                                                     |
| 43 |              |    |                                                                                     |
| 44 |              |    |                                                                                     |
| 45 |              |    |                                                                                     |
| 46 |              |    |                                                                                     |
| 47 |              |    |                                                                                     |
| 48 |              |    |                                                                                     |
| 49 |              |    |                                                                                     |
| 50 |              |    |                                                                                     |
| 51 |              |    |                                                                                     |
| 52 |              |    |                                                                                     |
| 53 |              |    |                                                                                     |
| 54 |              |    |                                                                                     |
| 55 |              |    |                                                                                     |
| 56 |              |    |                                                                                     |
| 57 |              |    |                                                                                     |
| 58 |              |    |                                                                                     |
| 59 |              |    |                                                                                     |
| 60 |              |    |                                                                                     |

|                          |    |                                                                                                                                                                            |       |
|--------------------------|----|----------------------------------------------------------------------------------------------------------------------------------------------------------------------------|-------|
| Other analyses           | 17 | Report other analyses done—eg analyses of subgroups and interactions, and sensitivity analyses                                                                             | N/A   |
| <b>Discussion</b>        |    |                                                                                                                                                                            |       |
| Key results              | 18 | Summarise key results with reference to study objectives                                                                                                                   | N/A   |
| Limitations              | 19 | Discuss limitations of the study, taking into account sources of potential bias or imprecision. Discuss both direction and magnitude of any potential bias                 | N/A   |
| Interpretation           | 20 | Give a cautious overall interpretation of results considering objectives, limitations, multiplicity of analyses, results from similar studies, and other relevant evidence | 9     |
| Generalisability         | 21 | Discuss the generalisability (external validity) of the study results                                                                                                      | 9     |
| <b>Other information</b> |    |                                                                                                                                                                            |       |
| Funding                  | 22 | Give the source of funding and the role of the funders for the present study and, if applicable, for the original study on which the present article is based              | 10-11 |

\*Give information separately for cases and controls.

**Note:** An Explanation and Elaboration article discusses each checklist item and gives methodological background and published examples of transparent reporting. The STROBE checklist is best used in conjunction with this article (freely available on the Web sites of PLoS Medicine at <http://www.plosmedicine.org/>, Annals of Internal Medicine at <http://www.annals.org/>, and Epidemiology at <http://www.epidem.com/>). Information on the STROBE Initiative is available at <http://www.strobe-statement.org>.

# BMJ Open

## Genome-Wide Association Study of suicide attempt in a Mexican population: A study protocol

|                                 |                                                                                                                                                                                                                                                                                                                                                                                                                                                                                                                                                                                                                                                                                                                                                                                                                                                                                                                                                                                                           |
|---------------------------------|-----------------------------------------------------------------------------------------------------------------------------------------------------------------------------------------------------------------------------------------------------------------------------------------------------------------------------------------------------------------------------------------------------------------------------------------------------------------------------------------------------------------------------------------------------------------------------------------------------------------------------------------------------------------------------------------------------------------------------------------------------------------------------------------------------------------------------------------------------------------------------------------------------------------------------------------------------------------------------------------------------------|
| Journal:                        | <i>BMJ Open</i>                                                                                                                                                                                                                                                                                                                                                                                                                                                                                                                                                                                                                                                                                                                                                                                                                                                                                                                                                                                           |
| Manuscript ID                   | bmjopen-2018-025335.R1                                                                                                                                                                                                                                                                                                                                                                                                                                                                                                                                                                                                                                                                                                                                                                                                                                                                                                                                                                                    |
| Article Type:                   | Protocol                                                                                                                                                                                                                                                                                                                                                                                                                                                                                                                                                                                                                                                                                                                                                                                                                                                                                                                                                                                                  |
| Date Submitted by the Author:   | 26-Nov-2018                                                                                                                                                                                                                                                                                                                                                                                                                                                                                                                                                                                                                                                                                                                                                                                                                                                                                                                                                                                               |
| Complete List of Authors:       | González-Castro, Thelma; Universidad Juárez Autónoma de Tabasco, División Académica Multidisciplinaria de Jalpa de Méndez<br>Genis-Mendoza, Alma; Instituto Nacional de Medicina Genómica, Laboratorio de Genómica de Enfermedades Psiquiátrica y Neurodegenerativas<br>Tovilla-Zárate, Carlos; Universidad Juárez Autónoma de Tabasco, División Multidisciplinaria de Comalcalco, División Académica Multidisciplinaria de Comalcalco<br>Martínez Magaña, José Jaime; Instituto Nacional de Medicina Genómica, Laboratorio de Genómica de Enfermedades Psiquiátrica y Neurodegenerativas; Universidad Juárez Autónoma de Tabasco, División Académica de Ciencias de la Salud<br>Juárez-Rojop, Isela; Universidad Juárez Autónoma de Tabasco, División Académica de Ciencias de la Salud<br>Sarmiento, Emmanuel; Hospital Psiquiátrico Infantil Ramon de la Fuente Nicolini, Humberto; Instituto Nacional de Medicina Genómica, Laboratorio de Genómica de Enfermedades Psiquiátrica y Neurodegenerativas |
| <b>Primary Subject Heading</b>: | Genetics and genomics                                                                                                                                                                                                                                                                                                                                                                                                                                                                                                                                                                                                                                                                                                                                                                                                                                                                                                                                                                                     |
| Secondary Subject Heading:      | Mental health                                                                                                                                                                                                                                                                                                                                                                                                                                                                                                                                                                                                                                                                                                                                                                                                                                                                                                                                                                                             |
| Keywords:                       | Suicide & self-harm < PSYCHIATRY, MENTAL HEALTH, Schizophrenia & psychotic disorders < PSYCHIATRY, GENETICS                                                                                                                                                                                                                                                                                                                                                                                                                                                                                                                                                                                                                                                                                                                                                                                                                                                                                               |
|                                 |                                                                                                                                                                                                                                                                                                                                                                                                                                                                                                                                                                                                                                                                                                                                                                                                                                                                                                                                                                                                           |

SCHOLARONE™  
Manuscripts

1  
2  
3 **Genome-Wide Association Study of suicide attempt in a Mexican population:**  
4 **A study protocol**  
5

6 Thelma Beatriz González-Castro<sup>1</sup>, Alma Delia Genis-Mendoza<sup>2,3</sup>, Carlos Alfonso  
7 Tovilla-Zarate<sup>4</sup>, José Jaime Martínez-Magaña<sup>2</sup>, Isela Esther Juárez-Rojop<sup>5</sup>,  
8 Emmanuel Sarmiento<sup>3</sup>, Humberto Nicolini<sup>\*2,3</sup>  
9

10  
11 <sup>1</sup> División Académica Multidisciplinaria de Jalpa de Méndez; Universidad Juárez  
12 Autónoma de Tabasco. Jalpa de Méndez, Tabasco, México.

13 <sup>2</sup> Instituto Nacional de Medicina Genómica (INMEGEN); Secretaria de Salud.  
14 Ciudad de México.

15 <sup>3</sup> Hospital Psiquiátrico Infantil "Dr. Juan N. Navarro". Ciudad de México

16 <sup>4</sup> División Académica Multidisciplinaria de Comalcalco; Universidad Juárez  
17 Autónoma de Tabasco. Comalcalco, Tabasco, México.

18 <sup>5</sup> División Académica Multidisciplinaria de Ciencias de la Salud; Universidad  
19 Juárez Autónoma de Tabasco. Villahermosa, Tabasco, México.

20 <sup>a</sup> These authors contributed equally to this work  
21  
22

23  
24 TBGC: thelma.glez.castro@gmail.com; CATZ: alfonso\_tovillaz@yahoo.com.mx;  
25 JJMM: jimy.10.06@gmail.com; IEJR: iselajuarezrojop@hotmail.com; ES:  
26 emmanuelssarmiento@hotmail.com  
27

28  
29 TBGC and ADGM contributed equally to this paper  
30

31  
32 \*Correspondence authors: Ph.D. Humberto Nicolini, National Institute of Genomic  
33 Medicine (INMEGEN), Psychiatric Care Services (SAP). Periférico Sur 4809,  
34 Arenal Tepepan, 14610, Mexico City, Mexico. Phone + 55 5350 1900. Email  
35 address: hnicolini@inmegen.gob.mx  
36  
37

38  
39  
40 Word count: 1,850  
41  
42  
43  
44  
45  
46  
47  
48  
49  
50  
51  
52  
53  
54  
55  
56  
57  
58  
59  
60

## Abstract

*Introduction:* Suicidality is a complex behavior and a major health problem; the specific features that could predispose to suicidal behavior have been extensively investigated, most frequently in European and Asian populations. Therefore, our aim is to present a protocol that will explore suicide attempt in Mexican individuals diagnosed with psychiatric disorders, by performing a genome-wide association study.

*Method and analysis:* we will perform a GWAS on 700 individuals who have a history of suicide attempt, and compare them to subjects without suicide attempt history diagnostic (n=500). The genotyping will be conducted using the Infinium PsychArray BeadChip and quality controls will be applied to the SNPs genotyped. After that, we will perform the imputation using reference panels provided by the Haplotype Reference Consortium. We will perform two different workflows: A) the classic GWAS analysis applying the same weight to all the variants and B) an algorithm with prediction of deleteriousness of variants.

### *Ethics and dissemination*

This study was approved by the ethics and investigation commitments of the National Institute of Genomic Medicine on July 22<sup>nd</sup> 2015, No. CEI 215/13. We plan to disseminate research findings in scientific conferences and as a manuscript in peer-reviewed journals.

*Trial registration:* CEI 215/13

**Keywords:** suicide & self-harm; mental health; schizophrenia & psychotic disorders; genetics.

## Article summary

### Strengths and limitations of this study

- This will be the first study that aims to perform a genome wide association study to assess suicide attempt in a Mexican population.
- The methodological analysis will explore the hypothesis that there are genes that increase the risk of suicide attempt in Mexican population.
- Recruiting participants from three clinical centers in the country will give a more representative sample of the Mexican population.
- Identifying genetic variants associated with suicide attempt will improve our understanding of the biological underlying this disease and could be useful for future microarrays designed to study Latin American populations.
- As the Mexican population has a heterogeneous genetic background, a possible limitation of this study will be that heterogeneity might interfere in the interpretation of results.



## 1 Introduction

2 Suicide is one of the leading causes of death worldwide. Individuals  
3 diagnosed with a psychiatric disorder have higher rates of suicide compared to the  
4 general population, which emphasizes a narrow relationship between suicide and  
5 psychiatric disorders. In this line of evidence, a considerable majority of suicide  
6 victims have had an undiagnosed psychiatric disorder at the time of death <sup>1-3</sup>.  
7 Furthermore, several studies consider psychiatric disorders as one of the main risk  
8 factors of suicide. Unfortunately, up to today, the mechanisms that explain this  
9 relationship have not been fully disentangled <sup>4 5</sup>.

10 Suicidal behavior (SB), has been defined as a complex issue that results  
11 from the combination of genetic variants along with personal experiences and  
12 environmental contribution; altogether, these factors establish the disease  
13 symptomatology manifestation [1, 3, 12]. The results of studies based on twins,  
14 adoptions and families, support the heritability of SB, pinpointing a genetic  
15 influence <sup>6-9</sup>. Subsequently, many candidate-gene association studies have been  
16 performed, with the different phenotypes of SB: suicide attempts, suicide ideation  
17 and accomplished suicide <sup>1 3 10-12</sup>. Unfortunately, SB is a polygenic trait and  
18 candidate-gene association studies underestimate the genetic background. In an  
19 attempt to search for this polygenic variation of SB, other strategies have been  
20 developed, such as the genome-wide association studies (GWAS) <sup>12-14</sup>.

21 Over the past decade, a small number of GWAS exploring common genetic  
22 variation mostly in suicide attempters, have found significant associations between  
23 genetic components and SB, establishing possible molecular pathways involved in  
24 the susceptibility of the disease <sup>15 16</sup>. Although a genetic diathesis model for

1  
2  
3 25 predisposition to SB has been proposed and GWAS have suggested candidate loci  
4  
5 26 or pathways, the only information available comes from studies analyzing  
6  
7 27 Caucasians or Asians populations, leaving behind Latin American populations  
8  
9 28 including Mexicans<sup>17-21</sup>. Therefore, more studies are necessary in order to have a  
10  
11 29 better comprehension of the genetic background of SB.  
12  
13  
14  
15 30

### 16 17 31 Objective

18  
19 32 Our aim is to perform the first genome-wide association study of suicide  
20  
21 33 attempters in a Mexican population, in order to explore and define the involvement  
22  
23 34 of a genetic diathesis that predisposes to SB in this population. In addition, we will  
24  
25 35 explore the hypothesis that there are genes and genetic variants that increase the  
26  
27 36 risk of suicide attempt in Mexican population and these factors could be common in  
28  
29 37 individuals with a psychiatric diagnostic.  
30  
31  
32  
33  
34

### 35 39 **Methods and analysis**

#### 36 37 40 *Sample population and setting*

38  
39  
40 41 The case group (n=700) will be formed by individuals who have had at least one  
41  
42 42 suicide attempt, and this will be determined using Structured Clinical Interview for  
43  
44 43 DSM-IV (SCID-I and II) in the Psychiatry out-patient area from three clinical  
45  
46 44 centers: “Dr. Gustavo A. Rovirosa” General Hospital in Tabasco, “Dr. Desiderio G.  
47  
48 45 Carbajal Regional Hospital in Tabasco, Mexico and “Dr. Juan N. Navarro”  
49  
50 46 Psychiatric Hospital in Mexico City. Individuals used as controls (n=500) will not  
51  
52 47 have current or past history of any suicidal behavior, with no first degree relatives  
53  
54 48 with a history of suicidal behavior and they will have to be unrelated to those in the  
55  
56  
57  
58  
59  
60

1  
2  
3 49 case group. Both cases and controls will be interviewed by two psychiatrist or  
4  
5 50 clinical specialists, together will determine the presence or absence of suicide  
6  
7 51 attempt. All individuals will be Mexican with Mexican ascendancy of at least two  
8  
9 52 generations (Mexican parents and grandparents); they will be recruited from  
10  
11 53 several Mexican hospitals and outpatient clinics.  
12  
13  
14  
15  
16

### 17 54 18 *Patient and Public Involvement*

19 56 The outcomes of the present protocol will be directly communicated to the patients  
20  
21 57 who participate or their legal caregivers. The results will also be discussed with  
22  
23 58 their psychiatrists and the corresponding health-education structures of the clinical  
24  
25 59 centers. However, the patients have not been directly participate in the study  
26  
27 60 design or any methodological procedures. Nevertheless, the authors of this  
28  
29 61 protocol have clinical experience with SB patients and their families, which helped  
30  
31 62 designed this study.  
32  
33  
34  
35  
36

### 37 63 38 *Ethics and dissemination*

39 64  
40 65 A written informed consent will be obtained from all individuals who accept  
41  
42 66 to participate. The study will be performed in accordance with the Helsinki  
43  
44 67 declaration (59th General Assembly, Seoul, Korea, October 2008). This study was  
45  
46 68 approved by the ethics and investigation commitments of the National Institute of  
47  
48 69 Genomic Medicine on July 22<sup>nd</sup> 2015, No. CEI 215/13. We plan to disseminate  
49  
50 70 research findings through scientific conferences and as a manuscript in peer-  
51  
52 71 reviewed journals.  
53  
54  
55  
56  
57  
58  
59  
60

1  
2  
3 73 *Clinical assessment*  
4

5 74 Diagnoses and clinical evaluations will be performed by at least two trained  
6  
7  
8 75 senior psychiatrists of whom at least one of them would have personally examined  
9  
10 76 the patient. All participants will undergo semi-structured interviews that will include  
11  
12 77 life-time and family history of suicidal behavior, among other clinical features.  
13  
14 78 Suicide attempt will be defined as a self-injurious act that had at least a partial  
15  
16 79 intent to end one's life; the number of attempts, method used and medical damage  
17  
18  
19 80 of past suicide attempts will be obtained.  
20  
21

22 81

23  
24 82 *Genotyping*  
25

26 83 The DNA will be isolated from peripheral blood leukocytes samples using a  
27  
28 84 standardized protocol of the Genomic Wizard Purification Kit from Promega, as  
29  
30 85 previously reported <sup>22-24</sup>. The integrity of genetic material will be checked on 1%  
31  
32 86 agarose gels and quantified by spectrophotometry using Nanodrop system.  
33  
34

35 87 The genotyping will be performed using the Infinium PsychArray BeadChip,  
36  
37 88 following the manufacturer's protocol <sup>25 26</sup>. This array contains approximately  
38  
39 89 580000 genetic variants, wherein include a set of genetic variants previously  
40  
41 90 associated with a variety of psychiatric illnesses. All genotyping analyses will be  
42  
43 91 performed at the National Institute of Genomic Medicine (INMEGEN). For quality  
44  
45 92 controls, we will filter-out samples and variants with call rates lower than 98% and  
46  
47 93 variants deviating from Hardy-Weinberg equilibrium, with a chi-square p-value <  
48  
49 94  $1 \times 10^{-6}$ . The concordance between gender will be performed based on the  
50  
51 95 heterozygosity of the X and Y chromosomes. All the filtering processes will be  
52  
53 96 performed using the PLINK v1.9 software <sup>27</sup>. After that, we will perform a  
54  
55  
56  
57  
58  
59  
60

1  
2  
3 97 multidimensional scaling (MDS) analysis in PLINK, all SNPs that pass quality  
4  
5 98 controls will be pruned and used to check population stratification in order to  
6  
7 99 evaluate the ancestry of individuals included. After the MDS analysis, the first five  
8  
9  
10 100 components will be used as covariates in the association analysis. MDS  
11  
12 101 dimensions will be graphically represented using the “MDS-plot” option. After  
13  
14 102 quality control procedures, we will perform the imputation using the reference  
15  
16 103 panels provided by the Haplotype Reference Consortium r.1.1; we will use the  
17  
18 104 Michigan Imputation Server for the imputation<sup>28 29</sup>.

105

#### 106 *Polygenic risk score calculation (PRS)*

107 PRS is a measurement of genetic liability to schizophrenia based on the  
108 Psychiatric Genomics Consortium (PGC) schizophrenia GWAS<sup>30</sup>. SNPs will be  
109 selected to be included in the PRS calculation based on p values obtained in the  
110 original PGC GWAS using PRSice<sup>31</sup>. PRS will be used to test an association with  
111 suicide attempt using linear regression models adjusted by age, sex, and four  
112 multidimensional-scaling components (MDS). The estimation of gene- or set-based  
113 association tests using GWAS summary data, will be performed using Genome-  
114 wide Complex Trait Analysis (GCTA)<sup>32 33</sup>.

115

#### 116 *Statistical analyses*

117 In order to evaluate the effect of genetic variants on suicidal behavior, we  
118 will perform two different workflows: A) a classic GWAS analysis applying the same  
119 importance to all the variants and B) an algorithm with prediction of  
120 deleteriousness of the variants. Concerning the first workflow, we will conduct a

1  
2  
3 121 mixed linear model analysis on imputed variants with a minor allele frequency of  
4  
5 122 5%. The implementation of linear mixed models will be performed on the GCTA  
6  
7 123 software<sup>34</sup>. For the second workflow, will include a prediction of the deliriousness  
8  
9  
10 124 of variants using different prediction algorithms, such as PolyPhen, SIFT, CADD,  
11  
12 125 VEP and ENCODE<sup>35-39</sup>. After the prediction of the functional impact of the  
13  
14 126 variants, we will compare the cases allele frequency of loss-of-function, missense  
15  
16 127 with deleterious effect, variants present in regulatory regions and variants with a  
17  
18 128 PHRED-CADD score higher than 20, with the allele frequency of the populations  
19  
20 129 reported in the 1000 genomes and ExAC database. GWAS analysis will be  
21  
22 130 performed on cases with a history of suicide attempts and compared to non-suicide  
23  
24 131 attempters. For the joint analysis, we will investigate the possibility of a new  
25  
26 132 association within the genome; therefore, multiple testing corrections will be  
27  
28 133 conducted using the Bonferroni correction and permutation; the corrected p value  
29  
30 134 will depend on the total number of independent tests.  
31  
32  
33  
34  
35  
36  
37

### 136 *Power analysis calculation*

38  
39 137 For the primary analysis of the GWAS suicide attempt using 700 cases and  
40  
41 138 500 controls, we will use a log additive model of inheritance, MAF of 25%,  $P_0$  of  
42  
43 139 0.08 the power will be 0.99. All the calculations will be performed using QUANTO  
44  
45 140 1.2.4. (<http://biostats.usc.edu/software>), as previously reported<sup>14</sup>.  
46  
47  
48

49 141

## 51 **Discussion**

52  
53 143 Various situations and contexts have been proposed as predictors of  
54  
55 144 suicidal behavior; among them, the presence of a psychiatric disorder seems to be  
56  
57  
58  
59  
60

1  
2  
3 145 an important determinant for such behavior. Likewise, the possible predisposition  
4  
5 146 of a genetic background to manifest SB has been supported by several  
6  
7 147 investigations, but the understanding of the precise genetic system that causes  
8  
9 148 such vulnerability to suicidal tendencies is still largely incomplete. Hence, the  
10  
11 149 principal aim of our protocol study is to explore the potential genetic influence on  
12  
13 150 SB in a Mexican population, throughout a genome-wide association study. In  
14  
15 151 addition, we want to emphasize that to our knowledge, this study protocol will be  
16  
17 152 the first one to evaluate suicidal behavior in patients with schizophrenia and bipolar  
18  
19 153 disorder in a Mexican population.  
20  
21  
22

23  
24 154 The majority of the genetic epidemiology evidence suggest that suicidal  
25  
26 155 behavior is a complex issue, where there are multiple genes that have a small  
27  
28 156 effect over SB; but if combined, could become predisposing factors. Therefore,  
29  
30 157 association studies that detect small effect contributions can be more useful, which  
31  
32 158 is a strength of this protocol. In this sense, one of the most powerful strengths of  
33  
34 159 the GWAS is that it uses many genetic markers across the whole genome to  
35  
36 160 search for associations with a particular disease; as it is based on no prior  
37  
38 161 assumptions, it explores a large number of genetic variants. For these reasons, we  
39  
40 162 will use GWAS to explore the genetic influence on suicidal behavior in  
41  
42 163 schizophrenics with and without SA, bipolar patients with and without SA, suicide  
43  
44 164 attempters and healthy subjects as controls. Therefore, the results of this study will  
45  
46 165 provide information to better comprehend the influence of the genetic background  
47  
48 166 on the development of suicidal behavior, among psychiatric patients.  
49  
50  
51

52  
53 167 Additionally, the findings of the present research could provide valuable information  
54  
55 168 for future researches who attempt to identify genetic risk factors of suicidal  
56  
57  
58  
59  
60

1  
2  
3 169 behavior, and help detect and/or treat this disease. Nowadays, there are  
4  
5 170 microarrays that have been used to study several genetic variables in Caucasian  
6  
7 171 and Asian populations; but to our knowledge, there is no evidence reported of  
8  
9 172 GWAS in studies that evaluate suicidal behavior in psychiatric patients. Therefore,  
10  
11 173 the outcomes of the study derived of the current protocol, could provide essential  
12  
13 174 information. The use of this type of genetic tools will allow us to identify associated  
14  
15 175 SNPs, missense and insertions and indels in mental illnesses such as  
16  
17 176 schizophrenia and bipolar disorder, as well as their possible participation as  
18  
19 177 predictors of suicidal behavior in a Mexican population. Consequently, these  
20  
21 178 findings could give important information to improve the design of future chips for  
22  
23 179 molecular diagnosis of psychiatric disorders in Mexicans, which will be very useful  
24  
25 180 in the prevention, diagnosis and prognosis of suicidal behavior in Mexico.  
26  
27  
28  
29

30  
31 181 In conclusion, the completion of the present protocol could impulse the  
32  
33 182 design of a microarray that includes associated variants to SB in Mexican  
34  
35 183 population. Moreover, the findings will give a better perspective of the participation  
36  
37 184 of the genetic background as a predictor of suicidal behavior in psychiatric  
38  
39 185 diseases. Hence, the outcomes would be useful in genetic research, as well as in  
40  
41 186 prevention and early diagnosis of suicidal behavior in Mexicans  
42  
43  
44  
45  
46  
47  
48  
49  
50  
51  
52  
53  
54  
55  
56  
57  
58  
59  
60



1  
2  
3 188 **Ethics and disseminations:**  
4

5 189 The study will be conducted in compliance with local regulations and internationally  
6  
7 190 established principles of the Declaration of Helsinki (59th General Assembly,  
8  
9 191 Seoul, Korea, October 2008). This study was approved by the ethics and  
10  
11 192 investigation commitments of the National Institute of Genomic Medicine on July  
12  
13 193 22nd 2015, No. CEI 215/13. Before inclusion, all patients are required to sign an  
14  
15 194 informed consent form.  
16  
17

18  
19 195 **Consent for publication:**  
20

21 196 Not applicable.  
22

23  
24 197 **Availability of data and material:**  
25

26 198 Not applicable.  
27

28  
29 199 **Competing interest statement:**  
30

31 200 The authors declare to have no competing interests.  
32

33 201 **Funding:**  
34

35 202 This protocol will receive the support of INMEGEN project number 23/2015/I via  
36  
37 203 Humberto Nicolini.  
38

39  
40 204 **Author contributions:**  
41

42 205 AGM, HN and JJMM conceived the study, participated in its design, helped to draft  
43  
44 206 the manuscript and mentored TBGC. CATZ, AGM and JJMM critically revised  
45  
46 207 successive drafts of the manuscript and provided important intellectual input. CATZ  
47  
48 208 and TBGC coordinated and supervised the integration of the manuscript. All  
49  
50 209 authors read and approved the final manuscript.  
51  
52

53  
54 210 **Acknowledgements**  
55

56 211 The protocol study will be a doctoral thesis of TBGC.  
57  
58  
59  
60

212 **References**

- 213 1. Perlis RH, Huang J, Purcell S, et al. Genome-wide association study of suicide attempts in mood  
214 disorder patients. *The American journal of psychiatry* 2010;167(12):1499-507. doi:  
215 10.1176/appi.ajp.2010.10040541 [published Online First: 2010/11/03]
- 216 2. Pulay AJ, Rethelyi JM. Multimarker analysis suggests the involvement of BDNF signaling and  
217 microRNA biosynthesis in suicidal behavior. *American journal of medical genetics Part B,*  
218 *Neuropsychiatric genetics : the official publication of the International Society of*  
219 *Psychiatric Genetics* 2016;171(6):763-76. doi: 10.1002/ajmg.b.32433 [published Online  
220 First: 2016/02/28]
- 221 3. Mullins N, Perroud N, Uher R, et al. Genetic relationships between suicide attempts, suicidal  
222 ideation and major psychiatric disorders: a genome-wide association and polygenic scoring  
223 study. *American journal of medical genetics Part B, Neuropsychiatric genetics : the official*  
224 *publication of the International Society of Psychiatric Genetics* 2014;165B(5):428-37. doi:  
225 10.1002/ajmg.b.32247 [published Online First: 2014/06/26]
- 226 4. Perroud N, Uher R, Ng MY, et al. Genome-wide association study of increasing suicidal ideation  
227 during antidepressant treatment in the GENDEP project. *Pharmacogenomics J*  
228 2012;12(1):68-77. doi: 10.1038/tpj.2010.70 [published Online First: 2010/09/30]
- 229 5. Stein MB, Ware EB, Mitchell C, et al. Genomewide association studies of suicide attempts in US  
230 soldiers. *American journal of medical genetics Part B, Neuropsychiatric genetics : the*  
231 *official publication of the International Society of Psychiatric Genetics* 2017;174(8):786-97.  
232 doi: 10.1002/ajmg.b.32594 [published Online First: 2017/09/14]
- 233 6. Levine SZ, Goldberg Y, Yoffe R, et al. Suicide attempts in a national population of twins  
234 concordant for psychoses. *European neuropsychopharmacology : the journal of the*  
235 *European College of Neuropsychopharmacology* 2014;24(8):1203-9. doi:  
236 10.1016/j.euroneuro.2014.05.014 [published Online First: 2014/06/28]
- 237 7. Linker J, Gillespie NA, Maes H, et al. Suicidal ideation, depression, and conduct disorder in a  
238 sample of adolescent and young adult twins. *Suicide & life-threatening behavior*  
239 2012;42(4):426-36. doi: 10.1111/j.1943-278X.2012.00101.x [published Online First:  
240 2012/06/01]
- 241 8. Petersen L, Sorensen TI, Kragh Andersen P, et al. Genetic and familial environmental effects on  
242 suicide attempts: a study of Danish adoptees and their biological and adoptive siblings.  
243 *Journal of affective disorders* 2014;155:273-7. doi: 10.1016/j.jad.2013.11.012 [published  
244 Online First: 2013/12/05]
- 245 9. Roy A, Rylander G, Sarchiapone M. Genetics of suicides. Family studies and molecular genetics.  
246 *Annals of the New York Academy of Sciences* 1997;836:135-57. [published Online First:  
247 1998/06/09]
- 248 10. Mirkovic B, Cohen D, Laurent C, et al. A case-control association study of 12 candidate genes  
249 and attempted suicide in French adolescents. *International journal of adolescent medicine*  
250 *and health* 2017 doi: 10.1515/ijamh-2017-0089 [published Online First: 2017/09/14]
- 251 11. Tombacz D, Maroti Z, Kalmar T, et al. High-Coverage Whole-Exome Sequencing Identifies  
252 Candidate Genes for Suicide in Victims with Major Depressive Disorder. *Scientific reports*  
253 2017;7(1):7106. doi: 10.1038/s41598-017-06522-3 [published Online First: 2017/08/05]
- 254 12. Sokolowski M, Wasserman J, Wasserman D. Rare CNVs in Suicide Attempt include  
255 Schizophrenia-Associated Loci and Neurodevelopmental Genes: A Pilot Genome-Wide and  
256 Family-Based Study. *PloS one* 2016;11(12):e0168531. doi: 10.1371/journal.pone.0168531  
257 [published Online First: 2016/12/29]

- 1  
2  
3 258 13. Gross JA, Bureau A, Croteau J, et al. A genome-wide copy number variant study of suicidal  
4 259 behavior. *PloS one* 2015;10(5):e0128369. doi: 10.1371/journal.pone.0128369 [published  
5 260 Online First: 2015/05/27]  
6 261 14. Galfalvy H, Haghghi F, Hodgkinson C, et al. A genome-wide association study of suicidal  
7 262 behavior. *American journal of medical genetics Part B, Neuropsychiatric genetics : the*  
8 263 *official publication of the International Society of Psychiatric Genetics* 2015;168(7):557-63.  
9 264 doi: 10.1002/ajmg.b.32330 [published Online First: 2015/06/17]  
10 265 15. Galfalvy H, Zalsman G, Huang YY, et al. A pilot genome wide association and gene expression  
11 266 array study of suicide with and without major depression. *The world journal of biological*  
12 267 *psychiatry : the official journal of the World Federation of Societies of Biological Psychiatry*  
13 268 2013;14(8):574-82. doi: 10.3109/15622975.2011.597875 [published Online First:  
14 269 2011/11/09]  
15 270 16. Laje G, Allen AS, Akula N, et al. Genome-wide association study of suicidal ideation emerging  
16 271 during citalopram treatment of depressed outpatients. *Pharmacogenet Genomics*  
17 272 2009;19(9):666-74. doi: 10.1097/FPC.0b013e32832e4bcd [published Online First:  
18 273 2009/09/03]  
19 274 17. Zai CC, Goncalves VF, Tiwari AK, et al. A genome-wide association study of suicide severity  
20 275 scores in bipolar disorder. *Journal of psychiatric research* 2015;65:23-9. doi:  
21 276 10.1016/j.jpsychires.2014.11.002 [published Online First: 2015/04/29]  
22 277 18. Menke A, Domschke K, Czamara D, et al. Genome-wide association study of antidepressant  
23 278 treatment-emergent suicidal ideation. *Neuropsychopharmacology : official publication of*  
24 279 *the American College of Neuropsychopharmacology* 2012;37(3):797-807. doi:  
25 280 10.1038/npp.2011.257 [published Online First: 2011/10/28]  
26 281 19. Bani-Fatemi A, Graff A, Zai C, et al. GWAS analysis of suicide attempt in schizophrenia: Main  
27 282 genetic effect and interaction with early life trauma. *Neurosci Lett* 2016;622:102-6. doi:  
28 283 10.1016/j.neulet.2016.04.043 [published Online First: 2016/04/26]  
29 284 20. Schosser A, Butler AW, Ising M, et al. Genomewide association scan of suicidal thoughts and  
30 285 behaviour in major depression. *PloS one* 2011;6(7):e20690. doi:  
31 286 10.1371/journal.pone.0020690 [published Online First: 2011/07/14]  
32 287 21. Willour VL, Seifuddin F, Mahon PB, et al. A genome-wide association study of attempted  
33 288 suicide. *Molecular psychiatry* 2012;17(4):433-44. doi: 10.1038/mp.2011.4 [published  
34 289 Online First: 2011/03/23]  
35 290 22. Gonzalez-Castro TB, Nicolini H, Lanzagorta N, et al. The role of brain-derived neurotrophic  
36 291 factor (BDNF) Val66Met genetic polymorphism in bipolar disorder: a case-control study,  
37 292 comorbidities, and meta-analysis of 16,786 subjects. *Bipolar disorders* 2015;17(1):27-38.  
38 293 doi: 10.1111/bdi.12227 [published Online First: 2014/07/22]  
39 294 23. Gonzalez-Castro TB, Tovilla-Zarate C, Juarez-Rojop I, et al. Association of the 5HTR2A gene with  
40 295 suicidal behavior: case-control study and updated meta-analysis. *BMC psychiatry*  
41 296 2013;13:25. doi: 10.1186/1471-244x-13-25 [published Online First: 2013/01/15]  
42 297 24. Gonzalez-Castro TB, Tovilla-Zarate CA, Juarez-Rojop I, et al. Association of 5HTR1A gene  
43 298 variants with suicidal behavior: case-control study and updated meta-analysis. *Journal of*  
44 299 *psychiatric research* 2013;47(11):1665-72. doi: 10.1016/j.jpsychires.2013.04.011  
45 300 [published Online First: 2013/08/06]  
46 301 25. Guo Y, He J, Zhao S, et al. Illumina human exome genotyping array clustering and quality  
47 302 control. *Nature protocols* 2014;9(11):2643-62. doi: 10.1038/nprot.2014.174 [published  
48 303 Online First: 2014/10/17]  
49 304 26. Borges G, Orozco R, Medina Mora ME. [Risk index for attempted suicide in Mexico]. *Salud*  
50 305 *publica de Mexico* 2012;54(6):595-606. [published Online First: 2013/01/16]  
51  
52  
53  
54  
55  
56  
57  
58  
59  
60

- 1  
2  
3 306 27. Chang CC, Chow CC, Tellier LC, et al. Second-generation PLINK: rising to the challenge of larger  
4 307 and richer datasets. *GigaScience* 2015;4:7. doi: 10.1186/s13742-015-0047-8 [published  
5 308 Online First: 2015/02/28]  
6 309 28. Loh PR, Danecek P, Palamara PF, et al. Reference-based phasing using the Haplotype Reference  
7 310 Consortium panel. *Nat Genet* 2016;48(11):1443-48. doi: 10.1038/ng.3679 [published  
8 311 Online First: 2016/10/28]  
9 312 29. McCarthy S, Das S, Kretzschmar W, et al. A reference panel of 64,976 haplotypes for genotype  
10 313 imputation. *Nat Genet* 2016;48(10):1279-83. doi: 10.1038/ng.3643 [published Online First:  
11 314 2016/08/23]  
12 315 30. Biological insights from 108 schizophrenia-associated genetic loci. *Nature* 2014;511(7510):421-  
13 316 7. doi: 10.1038/nature13595 [published Online First: 2014/07/25]  
14 317 31. Euesden J, Lewis CM, O'Reilly PF. PRSice: Polygenic Risk Score software. *Bioinformatics*  
15 318 2015;31(9):1466-8. doi: 10.1093/bioinformatics/btu848 [published Online First:  
16 319 2015/01/01]  
17 320 32. Yang J, Lee SH, Goddard ME, et al. GCTA: a tool for genome-wide complex trait analysis. *Am J*  
18 321 *Hum Genet* 2011;88(1):76-82. doi: 10.1016/j.ajhg.2010.11.011 [published Online First:  
19 322 2010/12/21]  
20 323 33. Bakshi A, Zhu Z, Vinkhuyzen AA, et al. Fast set-based association analysis using summary data  
21 324 from GWAS identifies novel gene loci for human complex traits. *Sci Rep* 2016;6:32894. doi:  
22 325 10.1038/srep32894 [published Online First: 2016/09/09]  
23 326 34. Yang J, Lee SH, Goddard ME, et al. Genome-wide complex trait analysis (GCTA): methods, data  
24 327 analyses, and interpretations. *Methods in molecular biology (Clifton, NJ)* 2013;1019:215-  
25 328 36. doi: 10.1007/978-1-62703-447-0\_9 [published Online First: 2013/06/13]  
26 329 35. Adzhubei I, Jordan DM, Sunyaev SR. Predicting functional effect of human missense mutations  
27 330 using PolyPhen-2. *Current protocols in human genetics* 2013;Chapter 7:Unit7.20. doi:  
28 331 10.1002/0471142905.hg0720s76 [published Online First: 2013/01/15]  
29 332 36. Ng PC, Henikoff S. Predicting deleterious amino acid substitutions. *Genome research*  
30 333 2001;11(5):863-74. doi: 10.1101/gr.176601 [published Online First: 2001/05/05]  
31 334 37. McLaren W, Gil L, Hunt SE, et al. The Ensembl Variant Effect Predictor. *Genome biology*  
32 335 2016;17(1):122. doi: 10.1186/s13059-016-0974-4 [published Online First: 2016/06/09]  
33 336 38. An integrated encyclopedia of DNA elements in the human genome. *Nature*  
34 337 2012;489(7414):57-74. doi: 10.1038/nature11247 [published Online First: 2012/09/08]  
35 338 39. Kircher M, Witten DM, Jain P, et al. A general framework for estimating the relative  
36 339 pathogenicity of human genetic variants. 2014;46(3):310-5. doi: 10.1038/ng.2892  
37  
38  
39  
40  
41  
42 340  
43  
44  
45  
46  
47  
48  
49  
50  
51  
52  
53  
54  
55  
56  
57  
58  
59  
60

# BMJ Open

## Genome-Wide Association Study of suicide attempt in a Mexican population: A study protocol

|                                 |                                                                                                                                                                                                                                                                                                                                                                                                                                                                                                                                                                                                                                                                                                                                                                                                                                                                                                                                                                                                          |
|---------------------------------|----------------------------------------------------------------------------------------------------------------------------------------------------------------------------------------------------------------------------------------------------------------------------------------------------------------------------------------------------------------------------------------------------------------------------------------------------------------------------------------------------------------------------------------------------------------------------------------------------------------------------------------------------------------------------------------------------------------------------------------------------------------------------------------------------------------------------------------------------------------------------------------------------------------------------------------------------------------------------------------------------------|
| Journal:                        | <i>BMJ Open</i>                                                                                                                                                                                                                                                                                                                                                                                                                                                                                                                                                                                                                                                                                                                                                                                                                                                                                                                                                                                          |
| Manuscript ID                   | bmjopen-2018-025335.R2                                                                                                                                                                                                                                                                                                                                                                                                                                                                                                                                                                                                                                                                                                                                                                                                                                                                                                                                                                                   |
| Article Type:                   | Protocol                                                                                                                                                                                                                                                                                                                                                                                                                                                                                                                                                                                                                                                                                                                                                                                                                                                                                                                                                                                                 |
| Date Submitted by the Author:   | 14-Dec-2018                                                                                                                                                                                                                                                                                                                                                                                                                                                                                                                                                                                                                                                                                                                                                                                                                                                                                                                                                                                              |
| Complete List of Authors:       | González-Castro, Thelma; Universidad Juárez Autónoma de Tabasco, División Académica Multidisciplinaria de Jalpa de Méndez<br>Genis-Mendoza, Alma; Instituto Nacional de Medicina Genómica, Laboratorio de Genómica de Enfermedades Psiquiátrica y Neurodegenerativas<br>Tovilla-Zárte, Carlos; Universidad Juárez Autónoma de Tabasco, División Multidisciplinaria de Comalcalco, División Académica Multidisciplinaria de Comalcalco<br>Martínez Magaña, José Jaime; Instituto Nacional de Medicina Genómica, Laboratorio de Genómica de Enfermedades Psiquiátrica y Neurodegenerativas; Universidad Juárez Autónoma de Tabasco, División Académica de Ciencias de la Salud<br>Juárez-Rojop, Isela; Universidad Juárez Autónoma de Tabasco, División Académica de Ciencias de la Salud<br>Sarmiento, Emmanuel; Hospital Psiquiátrico Infantil Ramon de la Fuente Nicolini, Humberto; Instituto Nacional de Medicina Genómica, Laboratorio de Genómica de Enfermedades Psiquiátrica y Neurodegenerativas |
| <b>Primary Subject Heading</b>: | Genetics and genomics                                                                                                                                                                                                                                                                                                                                                                                                                                                                                                                                                                                                                                                                                                                                                                                                                                                                                                                                                                                    |
| Secondary Subject Heading:      | Mental health                                                                                                                                                                                                                                                                                                                                                                                                                                                                                                                                                                                                                                                                                                                                                                                                                                                                                                                                                                                            |
| Keywords:                       | Suicide & self-harm < PSYCHIATRY, MENTAL HEALTH, Schizophrenia & psychotic disorders < PSYCHIATRY, GENETICS                                                                                                                                                                                                                                                                                                                                                                                                                                                                                                                                                                                                                                                                                                                                                                                                                                                                                              |
|                                 |                                                                                                                                                                                                                                                                                                                                                                                                                                                                                                                                                                                                                                                                                                                                                                                                                                                                                                                                                                                                          |

SCHOLARONE™  
Manuscripts

1  
2  
3 **Genome-Wide Association Study of suicide attempt in a Mexican population:**  
4 **A study protocol**  
5

6 Thelma Beatriz González-Castro<sup>1</sup>, Alma Delia Genis-Mendoza<sup>2,3</sup>, Carlos Alfonso  
7 Tovilla-Zarate<sup>4</sup>, José Jaime Martínez-Magaña<sup>2</sup>, Isela Esther Juárez-Rojop<sup>5</sup>,  
8 Emmanuel Sarmiento<sup>3</sup>, Humberto Nicolini<sup>\*2,3</sup>  
9

10  
11 <sup>1</sup> División Académica Multidisciplinaria de Jalpa de Méndez; Universidad Juárez  
12 Autónoma de Tabasco. Jalpa de Méndez, Tabasco, México.

13 <sup>2</sup> Instituto Nacional de Medicina Genómica (INMEGEN); Secretaria de Salud.  
14 Ciudad de México.

15 <sup>3</sup> Hospital Psiquiátrico Infantil "Dr. Juan N. Navarro". Ciudad de México

16 <sup>4</sup> División Académica Multidisciplinaria de Comalcalco; Universidad Juárez  
17 Autónoma de Tabasco. Comalcalco, Tabasco, México.

18 <sup>5</sup> División Académica Multidisciplinaria de Ciencias de la Salud; Universidad  
19 Juárez Autónoma de Tabasco. Villahermosa, Tabasco, México.

20 <sup>a</sup> These authors contributed equally to this work  
21  
22

23  
24 TBGC: thelma.glez.castro@gmail.com; CATZ: alfonso\_tovillaz@yahoo.com.mx;  
25 JJMM: jimy.10.06@gmail.com; IEJR: iselajuarezrojop@hotmail.com; ES:  
26 emmanuelssarmiento@hotmail.com  
27  
28

29  
30 TBGC and ADGM contributed equally to this paper  
31

32 \*Correspondence authors: Ph.D. Humberto Nicolini, National Institute of Genomic  
33 Medicine (INMEGEN), Psychiatric Care Services (SAP). Periférico Sur 4809,  
34 Arenal Tepepan, 14610, Mexico City, Mexico. Phone + 55 5350 1900. Email  
35 address: hnicolini@inmegen.gob.mx  
36  
37

38  
39  
40 Word count: 1,850  
41  
42  
43  
44  
45  
46  
47  
48  
49  
50  
51  
52  
53  
54  
55  
56  
57  
58  
59  
60

## Abstract

*Introduction:* Suicidality is a complex behavior and a major health problem; the specific features that could predispose to suicidal behavior have been extensively investigated, most frequently in European and Asian populations. Therefore, our aim is to present a protocol that will explore suicide attempt in Mexican individuals diagnosed with psychiatric disorders, by performing a genome-wide association study.

*Method and analysis:* we will perform a GWAS on 700 individuals who have a history of suicide attempt, and compare them to subjects without suicide attempt history diagnostic (n=500). The genotyping will be conducted using the Infinium PsychArray BeadChip and quality controls will be applied to the SNPs genotyped. After that, we will perform the imputation using reference panels provided by the Haplotype Reference Consortium. We will perform two different workflows: A) the classic GWAS analysis applying the same weight to all the variants and B) an algorithm with prediction of deleteriousness of variants.

### *Ethics and dissemination*

This study was approved by the ethics and investigation commitments of the National Institute of Genomic Medicine on July 22<sup>nd</sup> 2015, No. CEI 215/13. We plan to disseminate research findings in scientific conferences and as a manuscript in peer-reviewed journals.

*Trial registration:* CEI 215/13

**Keywords:** suicide & self-harm; mental health; schizophrenia & psychotic disorders; genetics.

## Article summary

### Strengths and limitations of this study

- This will be the first study that aims to perform a genome wide association study to assess suicide attempt in a Mexican population.
- The methodological analysis will explore the hypothesis that there are genes that increase the risk of suicide attempt in Mexican population.
- Recruiting participants from three clinical centers in the country will give a more representative sample of the Mexican population.
- Identifying genetic variants associated with suicide attempt will improve our understanding of the biological underlying this disease and could be useful for future microarrays designed to study Latin American populations.
- As the Mexican population has a heterogeneous genetic background, a possible limitation of this study will be that heterogeneity might interfere in the interpretation of results.



## 1 Introduction

2 Suicide is one of the leading causes of death worldwide. Individuals  
3 diagnosed with a psychiatric disorder have higher rates of suicide compared to the  
4 general population, which emphasizes a narrow relationship between suicide and  
5 psychiatric disorders. In this line of evidence, a considerable majority of suicide  
6 victims have had an undiagnosed psychiatric disorder at the time of death <sup>1-3</sup>.  
7 Furthermore, several studies consider psychiatric disorders as one of the main risk  
8 factors of suicide. Unfortunately, up to today, the mechanisms that explain this  
9 relationship have not been fully disentangled <sup>4 5</sup>.

10 Suicidal behavior (SB), has been defined as a complex issue that results  
11 from the combination of genetic variants along with personal experiences and  
12 environmental contribution; altogether, these factors establish the disease  
13 symptomatology manifestation [1, 3, 12]. The results of studies based on twins,  
14 adoptions and families, support the heritability of SB, pinpointing a genetic  
15 influence <sup>6-9</sup>. Subsequently, many candidate-gene association studies have been  
16 performed, with the different phenotypes of SB: suicide attempts, suicide ideation  
17 and accomplished suicide <sup>1 3 10-12</sup>. Unfortunately, SB is a polygenic trait and  
18 candidate-gene association studies underestimate the genetic background. In an  
19 attempt to search for this polygenic variation of SB, other strategies have been  
20 developed, such as the genome-wide association studies (GWAS) <sup>12-14</sup>.

21 Over the past decade, a small number of GWAS exploring common genetic  
22 variation mostly in suicide attempters, have found significant associations between  
23 genetic components and SB, establishing possible molecular pathways involved in  
24 the susceptibility of the disease <sup>15 16</sup>. Although a genetic diathesis model for

1  
2  
3 25 predisposition to SB has been proposed and GWAS have suggested candidate loci  
4  
5 26 or pathways, the only information available comes from studies analyzing  
6  
7 27 Caucasians or Asians populations, leaving behind Latin American populations  
8  
9 28 including Mexicans<sup>17-21</sup>. Therefore, more studies are necessary in order to have a  
10  
11 29 better comprehension of the genetic background of SB.  
12  
13  
14  
15 30

### 16 17 31 Objective

18  
19 32 Our aim is to perform the first genome-wide association study of suicide  
20  
21 33 attempters in a Mexican population, in order to explore and define the involvement  
22  
23 34 of a genetic diathesis that predisposes to SB in this population. In addition, we will  
24  
25 35 explore the hypothesis that there are genes and genetic variants that increase the  
26  
27 36 risk of suicide attempt in Mexican population and these factors could be common in  
28  
29 37 individuals with a psychiatric diagnostic.  
30  
31  
32  
33  
34

### 35 39 **Methods and analysis**

#### 36 37 40 *Sample population and setting*

38  
39  
40 41 The case group (n=700) will be formed by individuals who have had at least one  
41  
42 42 suicide attempt, and this will be determined using Structured Clinical Interview for  
43  
44 43 DSM-IV (SCID-I and II) in the Psychiatry out-patient area from three clinical  
45  
46 44 centers: “Dr. Gustavo A. Roviroso” General Hospital in Tabasco, “Dr. Desiderio G.  
47  
48 45 Carbajal Regional Hospital in Tabasco, Mexico and “Dr. Juan N. Navarro”  
49  
50 46 Psychiatric Hospital in Mexico City. Individuals used as controls (n=500) will not  
51  
52 47 have current or past history of any suicidal behavior, with no first degree relatives  
53  
54 48 with a history of suicidal behavior and they will have to be unrelated to those in the  
55  
56  
57  
58  
59  
60

1  
2  
3 49 case group. Both cases and controls will be interviewed by two psychiatrist or  
4  
5 50 clinical specialists, together will determine the presence or absence of suicide  
6  
7 51 attempt. All individuals will be Mexican with Mexican ascendancy of at least two  
8  
9 52 generations (Mexican parents and grandparents); they will be recruited from  
10  
11 53 several Mexican hospitals and outpatient clinics.  
12  
13  
14  
15  
16

### 17 54 18 *Patient and Public Involvement*

19 56 The outcomes of the present protocol will be directly communicated to the patients  
20  
21 57 who participate or their legal caregivers. The results will also be discussed with  
22  
23 58 their psychiatrists and the corresponding health-education structures of the clinical  
24  
25 59 centers. However, the patients have not been directly participate in the study  
26  
27 60 design or any methodological procedures. Nevertheless, the authors of this  
28  
29 61 protocol have clinical experience with SB patients and their families, which helped  
30  
31 62 designed this study.  
32  
33  
34  
35  
36

### 37 63 38 *Ethics and dissemination*

39 64  
40 65 A written informed consent will be obtained from all individuals who accept  
41  
42 66 to participate. The study will be performed in accordance with the Helsinki  
43  
44 67 declaration (59th General Assembly, Seoul, Korea, October 2008). This study was  
45  
46 68 approved by the ethics and investigation commitments of the National Institute of  
47  
48 69 Genomic Medicine on July 22<sup>nd</sup> 2015, No. CEI 215/13. We plan to disseminate  
49  
50 70 research findings through scientific conferences and as a manuscript in peer-  
51  
52 71 reviewed journals.  
53  
54  
55  
56  
57  
58  
59  
60

1  
2  
3 73 *Clinical assessment*  
4

5 74 Diagnoses and clinical evaluations will be performed by at least two trained  
6  
7  
8 75 senior psychiatrists of whom at least one of them would have personally examined  
9  
10 76 the patient. All participants will undergo semi-structured interviews that will include  
11  
12 77 life-time and family history of suicidal behavior, among other clinical features.  
13  
14 78 Suicide attempt will be defined as a self-injurious act that had at least a partial  
15  
16 79 intent to end one's life; the number of attempts, method used and medical damage  
17  
18  
19 80 of past suicide attempts will be obtained.  
20

21  
22 81

23  
24 82 *Genotyping*  
25

26 83 The DNA will be isolated from peripheral blood leukocytes samples using a  
27  
28 84 standardized protocol of the Genomic Wizard Purification Kit from Promega, as  
29  
30 85 previously reported <sup>22-24</sup>. The integrity of genetic material will be checked on 1%  
31  
32 86 agarose gels and quantified by spectrophotometry using Nanodrop system.  
33  
34

35 87 The genotyping will be performed using the Infinium PsychArray BeadChip,  
36  
37 88 following the manufacturer's protocol <sup>25 26</sup>. This array contains approximately  
38  
39 89 580000 genetic variants, wherein include a set of genetic variants previously  
40  
41 90 associated with a variety of psychiatric illnesses. All genotyping analyses will be  
42  
43 91 performed at the National Institute of Genomic Medicine (INMEGEN). For quality  
44  
45 92 controls, we will filter-out samples and variants with call rates lower than 98% and  
46  
47 93 variants deviating from Hardy-Weinberg equilibrium, with a chi-square p-value <  
48  
49 94  $1 \times 10^{-6}$ . The concordance between gender will be performed based on the  
50  
51 95 heterozygosity of the X and Y chromosomes. All the filtering processes will be  
52  
53 96 performed using the PLINK v1.9 software <sup>27</sup>. After that, we will perform a  
54  
55  
56  
57  
58  
59  
60

1  
2  
3 97 multidimensional scaling (MDS) analysis in PLINK, all SNPs that pass quality  
4  
5 98 controls will be pruned and used to check population stratification in order to  
6  
7 99 evaluate the ancestry of individuals included. After the MDS analysis, the first five  
8  
9  
10 100 components will be used as covariates in the association analysis. MDS  
11  
12 101 dimensions will be graphically represented using the “MDS-plot” option. After  
13  
14 102 quality control procedures, we will perform the imputation using the reference  
15  
16 103 panels provided by the Haplotype Reference Consortium r.1.1; we will use the  
17  
18 104 Michigan Imputation Server for the imputation<sup>28 29</sup>.

105

#### 106 *Polygenic risk score calculation (PRS)*

107 PRS is a measurement of genetic liability to schizophrenia based on the  
108 Psychiatric Genomics Consortium (PGC) schizophrenia GWAS<sup>30</sup>. SNPs will be  
109 selected to be included in the PRS calculation based on p values obtained in the  
110 original PGC GWAS using PRSice<sup>31</sup>. PRS will be used to test an association with  
111 suicide attempt using linear regression models adjusted by age, sex, and four  
112 multidimensional-scaling components (MDS). The estimation of gene- or set-based  
113 association tests using GWAS summary data, will be performed using Genome-  
114 wide Complex Trait Analysis (GCTA)<sup>32 33</sup>.

115

#### 116 *Statistical analyses*

117 In order to evaluate the effect of genetic variants on suicidal behavior, we  
118 will perform two different workflows: A) a classic GWAS analysis applying the same  
119 importance to all the variants and B) an algorithm with prediction of  
120 deleteriousness of the variants. Concerning the first workflow, we will conduct a

1  
2  
3 121 mixed linear model analysis on imputed variants with a minor allele frequency of  
4  
5 122 5%. The implementation of linear mixed models will be performed on the GCTA  
6  
7 123 software<sup>34</sup>. For the second workflow, will include a prediction of the deliriousness  
8  
9  
10 124 of variants using different prediction algorithms, such as PolyPhen, SIFT, CADD,  
11  
12 125 VEP and ENCODE<sup>35-39</sup>. After the prediction of the functional impact of the  
13  
14 126 variants, we will compare the cases allele frequency of loss-of-function, missense  
15  
16 127 with deleterious effect, variants present in regulatory regions and variants with a  
17  
18 128 PHRED-CADD score higher than 20, with the allele frequency of the populations  
19  
20 129 reported in the 1000 genomes and ExAC database. GWAS analysis will be  
21  
22 130 performed on cases with a history of suicide attempts and compared to non-suicide  
23  
24 131 attempters. Genome wide significance will be set at  $P < 5 \times 10^{-08}$  .  
25  
26  
27  
28  
29

### 30 31 *Power analysis calculation*

32  
33 134 For GWAS analysis, we performed power calculations in QUANTO 1.2.4  
34  
35 135 (<http://biostats.usc.edu/software>)<sup>14</sup>. The analysis use a log additive model of  
36  
37 136 inheritance to detect a power of 0.98 at significance threshold  $5 \times 10^{-08}$  to detect an  
38  
39 137 effect size of  $OR \geq 2$  with a MAF of 0.25 and a  $P_0$  of 0.08. Also testing the lower  
40  
41 138 bounds of the effect sizes of the variants, we observe a power of 0.82 with an  
42  
43 139 effect size of 1.8,  $P_0=0.08$  and MAF=0.25 at the same significance level. The  $P_0$   
44  
45 140 that we used is the baseline risk of suicide attempt in our population based on  
46  
47 141 previous reports<sup>40 41</sup>. Therefore, our study will be powered to detect genetics  
48  
49 142 effects.  
50  
51  
52  
53  
54  
55  
56  
57  
58  
59  
60

## 145 **Discussion**

146 Various situations and contexts have been proposed as predictors of  
147 suicidal behavior; among them, the presence of a psychiatric disorder seems to be  
148 an important determinant for such behavior. Likewise, the possible predisposition  
149 of a genetic background to manifest SB has been supported by several  
150 investigations, but the understanding of the precise genetic system that causes  
151 such vulnerability to suicidal tendencies is still largely incomplete. Hence, the  
152 principal aim of our protocol study is to explore the potential genetic influence on  
153 SB in a Mexican population, throughout a genome-wide association study. In  
154 addition, we want to emphasize that to our knowledge, this study protocol will be  
155 the first one to evaluate suicidal behavior in patients with schizophrenia and bipolar  
156 disorder in a Mexican population.

157 The majority of the genetic epidemiology evidence suggest that suicidal  
158 behavior is a complex issue, where there are multiple genes that have a small  
159 effect over SB; but if combined, could become predisposing factors. Therefore,  
160 association studies that detect small effect contributions can be more useful, which  
161 is a strength of this protocol. In this sense, one of the most powerful strengths of  
162 the GWAS is that it uses many genetic markers across the whole genome to  
163 search for associations with a particular disease; as it is based on no prior  
164 assumptions, it explores a large number of genetic variants. For these reasons, we  
165 will use GWAS to explore the genetic influence on suicidal behavior in  
166 schizophrenics with and without SA, bipolar patients with and without SA, suicide  
167 attempters and healthy subjects as controls. Therefore, the results of this study will

1  
2  
3 168 provide information to better comprehend the influence of the genetic background  
4  
5 169 on the development of suicidal behavior, among psychiatric patients.  
6  
7 170 Additionally, the findings of the present research could provide valuable information  
8  
9 171 for future researches who attempt to identify genetic risk factors of suicidal  
10  
11 172 behavior, and help detect and/or treat this disease. Nowadays, there are  
12  
13 173 microarrays that have been used to study several genetic variables in Caucasian  
14  
15 174 and Asian populations; but to our knowledge, there is no evidence reported of  
16  
17 175 GWAS in studies that evaluate suicidal behavior in psychiatric patients. Therefore,  
18  
19 176 the outcomes of the study derived of the current protocol, could provide essential  
20  
21 177 information. The use of this type of genetic tools will allow us to identify associated  
22  
23 178 SNPs, missense and insertions and indels in mental illnesses such as  
24  
25 179 schizophrenia and bipolar disorder, as well as their possible participation as  
26  
27 180 predictors of suicidal behavior in a Mexican population. Consequently, these  
28  
29 181 findings could give important information to improve the design of future chips for  
30  
31 182 molecular diagnosis of psychiatric disorders in Mexicans, which will be very useful  
32  
33 183 in the prevention, diagnosis and prognosis of suicidal behavior in Mexico.  
34  
35  
36  
37  
38  
39

40 184 In conclusion, the completion of the present protocol could impulse the  
41  
42 185 design of a microarray that includes associated variants to SB in Mexican  
43  
44 186 population. Moreover, the findings will give a better perspective of the participation  
45  
46 187 of the genetic background as a predictor of suicidal behavior in psychiatric  
47  
48 188 diseases. Hence, the outcomes would be useful in genetic research, as well as in  
49  
50 189 prevention and early diagnosis of suicidal behavior in Mexicans  
51  
52  
53

54 190  
55  
56  
57  
58  
59  
60



1  
2  
3 191 **Ethics and disseminations:**  
4

5 192 The study will be conducted in compliance with local regulations and internationally  
6  
7 193 established principles of the Declaration of Helsinki (59th General Assembly,  
8  
9 194 Seoul, Korea, October 2008). This study was approved by the ethics and  
10  
11 195 investigation commitments of the National Institute of Genomic Medicine on July  
12  
13 196 22nd 2015, No. CEI 215/13. Before inclusion, all patients are required to sign an  
14  
15 197 informed consent form.  
16  
17

18  
19 198 **Consent for publication:**  
20

21 199 Not applicable.  
22

23 200 **Availability of data and material:**  
24

25 201 Not applicable.  
26  
27

28 202 **Competing interest statement:**  
29

30 203 The authors declare to have no competing interests.  
31  
32

33 204 **Funding:**  
34

35 205 This protocol will receive the support of INMEGEN project number 23/2015/I via  
36  
37 206 Humberto Nicolini.  
38  
39

40 207 **Author contributions:**  
41

42 208 ADGM, HN and JJMM conceived the study, participated in its design, helped to  
43  
44 209 draft the manuscript and mentored TBGC. CATZ, ADGM and JJMM critically  
45  
46 210 revised successive drafts of the manuscript and provided important intellectual  
47  
48 211 input. CATZ and TBGC coordinated and supervised the integration of the  
49  
50 212 manuscript. ES, IEJR, HN and ADGM contributed to developing the analytic plan  
51  
52 213 proposed for this study. All authors read and approved the final manuscript.  
53  
54  
55

56 214  
57  
58  
59  
60

## 215 Acknowledgements

216 The protocol study will be a doctoral thesis of TBGC.

## 217 References

- 218 1. Perlis RH, Huang J, Purcell S, et al. Genome-wide association study of suicide attempts in mood  
219 disorder patients. *The American journal of psychiatry* 2010;167(12):1499-507. doi:  
220 10.1176/appi.ajp.2010.10040541 [published Online First: 2010/11/03]
- 221 2. Pulay AJ, Rethelyi JM. Multimarker analysis suggests the involvement of BDNF signaling and  
222 microRNA biosynthesis in suicidal behavior. *American journal of medical genetics Part B,*  
223 *Neuropsychiatric genetics : the official publication of the International Society of*  
224 *Psychiatric Genetics* 2016;171(6):763-76. doi: 10.1002/ajmg.b.32433 [published Online  
225 First: 2016/02/28]
- 226 3. Mullins N, Perroud N, Uher R, et al. Genetic relationships between suicide attempts, suicidal  
227 ideation and major psychiatric disorders: a genome-wide association and polygenic scoring  
228 study. *American journal of medical genetics Part B, Neuropsychiatric genetics : the official*  
229 *publication of the International Society of Psychiatric Genetics* 2014;165B(5):428-37. doi:  
230 10.1002/ajmg.b.32247 [published Online First: 2014/06/26]
- 231 4. Perroud N, Uher R, Ng MY, et al. Genome-wide association study of increasing suicidal ideation  
232 during antidepressant treatment in the GENDEP project. *Pharmacogenomics J*  
233 2012;12(1):68-77. doi: 10.1038/tpj.2010.70 [published Online First: 2010/09/30]
- 234 5. Stein MB, Ware EB, Mitchell C, et al. Genomewide association studies of suicide attempts in US  
235 soldiers. *American journal of medical genetics Part B, Neuropsychiatric genetics : the*  
236 *official publication of the International Society of Psychiatric Genetics* 2017;174(8):786-97.  
237 doi: 10.1002/ajmg.b.32594 [published Online First: 2017/09/14]
- 238 6. Levine SZ, Goldberg Y, Yoffe R, et al. Suicide attempts in a national population of twins  
239 concordant for psychoses. *European neuropsychopharmacology : the journal of the*  
240 *European College of Neuropsychopharmacology* 2014;24(8):1203-9. doi:  
241 10.1016/j.euroneuro.2014.05.014 [published Online First: 2014/06/28]
- 242 7. Linker J, Gillespie NA, Maes H, et al. Suicidal ideation, depression, and conduct disorder in a  
243 sample of adolescent and young adult twins. *Suicide & life-threatening behavior*  
244 2012;42(4):426-36. doi: 10.1111/j.1943-278X.2012.00101.x [published Online First:  
245 2012/06/01]
- 246 8. Petersen L, Sorensen TI, Kragh Andersen P, et al. Genetic and familial environmental effects on  
247 suicide attempts: a study of Danish adoptees and their biological and adoptive siblings.  
248 *Journal of affective disorders* 2014;155:273-7. doi: 10.1016/j.jad.2013.11.012 [published  
249 Online First: 2013/12/05]
- 250 9. Roy A, Rylander G, Sarchiapone M. Genetics of suicides. Family studies and molecular genetics.  
251 *Annals of the New York Academy of Sciences* 1997;836:135-57. [published Online First:  
252 1998/06/09]
- 253 10. Mirkovic B, Cohen D, Laurent C, et al. A case-control association study of 12 candidate genes  
254 and attempted suicide in French adolescents. *International journal of adolescent medicine*  
255 *and health* 2017 doi: 10.1515/ijamh-2017-0089 [published Online First: 2017/09/14]
- 256 11. Tombacz D, Maroti Z, Kalmar T, et al. High-Coverage Whole-Exome Sequencing Identifies  
257 Candidate Genes for Suicide in Victims with Major Depressive Disorder. *Scientific reports*  
258 2017;7(1):7106. doi: 10.1038/s41598-017-06522-3 [published Online First: 2017/08/05]

- 1  
2  
3 259 12. Sokolowski M, Wasserman J, Wasserman D. Rare CNVs in Suicide Attempt include  
4 260 Schizophrenia-Associated Loci and Neurodevelopmental Genes: A Pilot Genome-Wide and  
5 261 Family-Based Study. *PLoS one* 2016;11(12):e0168531. doi: 10.1371/journal.pone.0168531  
6 262 [published Online First: 2016/12/29]  
7  
8 263 13. Gross JA, Bureau A, Croteau J, et al. A genome-wide copy number variant study of suicidal  
9 264 behavior. *PLoS one* 2015;10(5):e0128369. doi: 10.1371/journal.pone.0128369 [published  
10 265 Online First: 2015/05/27]  
11 266 14. Galfalvy H, Haghghi F, Hodgkinson C, et al. A genome-wide association study of suicidal  
12 267 behavior. *American journal of medical genetics Part B, Neuropsychiatric genetics : the*  
13 268 *official publication of the International Society of Psychiatric Genetics* 2015;168(7):557-63.  
14 269 doi: 10.1002/ajmg.b.32330 [published Online First: 2015/06/17]  
15 270 15. Galfalvy H, Zalsman G, Huang YY, et al. A pilot genome wide association and gene expression  
16 271 array study of suicide with and without major depression. *The world journal of biological*  
17 272 *psychiatry : the official journal of the World Federation of Societies of Biological Psychiatry*  
18 273 2013;14(8):574-82. doi: 10.3109/15622975.2011.597875 [published Online First:  
19 274 2011/11/09]  
20  
21 275 16. Laje G, Allen AS, Akula N, et al. Genome-wide association study of suicidal ideation emerging  
22 276 during citalopram treatment of depressed outpatients. *Pharmacogenet Genomics*  
23 277 2009;19(9):666-74. doi: 10.1097/FPC.0b013e32832e4bcd [published Online First:  
24 278 2009/09/03]  
25  
26 279 17. Zai CC, Goncalves VF, Tiwari AK, et al. A genome-wide association study of suicide severity  
27 280 scores in bipolar disorder. *Journal of psychiatric research* 2015;65:23-9. doi:  
28 281 10.1016/j.jpsychires.2014.11.002 [published Online First: 2015/04/29]  
29 282 18. Menke A, Domschke K, Czamara D, et al. Genome-wide association study of antidepressant  
30 283 treatment-emergent suicidal ideation. *Neuropsychopharmacology : official publication of*  
31 284 *the American College of Neuropsychopharmacology* 2012;37(3):797-807. doi:  
32 285 10.1038/npp.2011.257 [published Online First: 2011/10/28]  
33 286 19. Bani-Fatemi A, Graff A, Zai C, et al. GWAS analysis of suicide attempt in schizophrenia: Main  
34 287 genetic effect and interaction with early life trauma. *Neurosci Lett* 2016;622:102-6. doi:  
35 288 10.1016/j.neulet.2016.04.043 [published Online First: 2016/04/26]  
36 289 20. Schosser A, Butler AW, Ising M, et al. Genomewide association scan of suicidal thoughts and  
37 290 behaviour in major depression. *PLoS one* 2011;6(7):e20690. doi:  
38 291 10.1371/journal.pone.0020690 [published Online First: 2011/07/14]  
39 292 21. Willour VL, Seifuddin F, Mahon PB, et al. A genome-wide association study of attempted  
40 293 suicide. *Molecular psychiatry* 2012;17(4):433-44. doi: 10.1038/mp.2011.4 [published  
41 294 Online First: 2011/03/23]  
42 295 22. Gonzalez-Castro TB, Nicolini H, Lanzagorta N, et al. The role of brain-derived neurotrophic  
43 296 factor (BDNF) Val66Met genetic polymorphism in bipolar disorder: a case-control study,  
44 297 comorbidities, and meta-analysis of 16,786 subjects. *Bipolar disorders* 2015;17(1):27-38.  
45 298 doi: 10.1111/bdi.12227 [published Online First: 2014/07/22]  
46 299 23. Gonzalez-Castro TB, Tovilla-Zarate C, Juarez-Rojop I, et al. Association of the 5HTR2A gene with  
47 300 suicidal behavior: case-control study and updated meta-analysis. *BMC psychiatry*  
48 301 2013;13:25. doi: 10.1186/1471-244x-13-25 [published Online First: 2013/01/15]  
49 302 24. Gonzalez-Castro TB, Tovilla-Zarate CA, Juarez-Rojop I, et al. Association of 5HTR1A gene  
50 303 variants with suicidal behavior: case-control study and updated meta-analysis. *Journal of*  
51 304 *psychiatric research* 2013;47(11):1665-72. doi: 10.1016/j.jpsychires.2013.04.011  
52 305 [published Online First: 2013/08/06]  
53  
54  
55  
56  
57  
58  
59  
60

- 1  
2  
3 306 25. Guo Y, He J, Zhao S, et al. Illumina human exome genotyping array clustering and quality  
4 307 control. *Nature protocols* 2014;9(11):2643-62. doi: 10.1038/nprot.2014.174 [published  
5 308 Online First: 2014/10/17]  
6 309 26. Borges G, Orozco R, Medina Mora ME. [Risk index for attempted suicide in Mexico]. *Salud*  
7 310 *publica de Mexico* 2012;54(6):595-606. [published Online First: 2013/01/16]  
8 311 27. Chang CC, Chow CC, Tellier LC, et al. Second-generation PLINK: rising to the challenge of larger  
9 312 and richer datasets. *GigaScience* 2015;4:7. doi: 10.1186/s13742-015-0047-8 [published  
10 313 Online First: 2015/02/28]  
11 314 28. Loh PR, Danecek P, Palamara PF, et al. Reference-based phasing using the Haplotype Reference  
12 315 Consortium panel. *Nat Genet* 2016;48(11):1443-48. doi: 10.1038/ng.3679 [published  
13 316 Online First: 2016/10/28]  
14 317 29. McCarthy S, Das S, Kretzschmar W, et al. A reference panel of 64,976 haplotypes for genotype  
15 318 imputation. *Nat Genet* 2016;48(10):1279-83. doi: 10.1038/ng.3643 [published Online First:  
16 319 2016/08/23]  
17 320 30. Biological insights from 108 schizophrenia-associated genetic loci. *Nature* 2014;511(7510):421-  
18 321 7. doi: 10.1038/nature13595 [published Online First: 2014/07/25]  
19 322 31. Euesden J, Lewis CM, O'Reilly PF. PRSice: Polygenic Risk Score software. *Bioinformatics*  
20 323 2015;31(9):1466-8. doi: 10.1093/bioinformatics/btu848 [published Online First:  
21 324 2015/01/01]  
22 325 32. Yang J, Lee SH, Goddard ME, et al. GCTA: a tool for genome-wide complex trait analysis. *Am J*  
23 326 *Hum Genet* 2011;88(1):76-82. doi: 10.1016/j.ajhg.2010.11.011 [published Online First:  
24 327 2010/12/21]  
25 328 33. Bakshi A, Zhu Z, Vinkhuyzen AA, et al. Fast set-based association analysis using summary data  
26 329 from GWAS identifies novel gene loci for human complex traits. *Sci Rep* 2016;6:32894. doi:  
27 330 10.1038/srep32894 [published Online First: 2016/09/09]  
28 331 34. Yang J, Lee SH, Goddard ME, et al. Genome-wide complex trait analysis (GCTA): methods, data  
29 332 analyses, and interpretations. *Methods in molecular biology (Clifton, NJ)* 2013;1019:215-  
30 333 36. doi: 10.1007/978-1-62703-447-0\_9 [published Online First: 2013/06/13]  
31 334 35. Adzhubei I, Jordan DM, Sunyaev SR. Predicting functional effect of human missense mutations  
32 335 using PolyPhen-2. *Current protocols in human genetics* 2013;Chapter 7:Unit7.20. doi:  
33 336 10.1002/0471142905.hg0720s76 [published Online First: 2013/01/15]  
34 337 36. Ng PC, Henikoff S. Predicting deleterious amino acid substitutions. *Genome research*  
35 338 2001;11(5):863-74. doi: 10.1101/gr.176601 [published Online First: 2001/05/05]  
36 339 37. McLaren W, Gil L, Hunt SE, et al. The Ensembl Variant Effect Predictor. *Genome biology*  
37 340 2016;17(1):122. doi: 10.1186/s13059-016-0974-4 [published Online First: 2016/06/09]  
38 341 38. An integrated encyclopedia of DNA elements in the human genome. *Nature*  
39 342 2012;489(7414):57-74. doi: 10.1038/nature11247 [published Online First: 2012/09/08]  
40 343 39. Kircher M, Witten DM, Jain P, et al. A general framework for estimating the relative  
41 344 pathogenicity of human genetic variants. 2014;46(3):310-5. doi: 10.1038/ng.2892  
42 345 40. Romero-Pimentel AL, Mendoza-Morales RC, Fresan A, et al. Demographic and Clinical  
43 346 Characteristics of Completed Suicides in Mexico City 2014-2015. *Front Psychiatry*  
44 347 2018;9:402. doi: 10.3389/fpsy.2018.00402 [published Online First: 2018/09/25]  
45 348 41. Bachmann S. Epidemiology of Suicide and the Psychiatric Perspective. *International journal of*  
46 349 *environmental research and public health* 2018;15(7) doi: 10.3390/ijerph15071425  
47 350 [published Online First: 2018/07/11]  
48  
49  
50  
51  
52  
53  
54 351  
55  
56  
57  
58  
59  
60

# BMJ Open

## Genome-Wide Association Study of suicide attempt in a Mexican population: A study protocol

|                                 |                                                                                                                                                                                                                                                                                                                                                                                                                                                                                                                                                                                                                                                                                                                                                                                                                                                                                                                                                                                                          |
|---------------------------------|----------------------------------------------------------------------------------------------------------------------------------------------------------------------------------------------------------------------------------------------------------------------------------------------------------------------------------------------------------------------------------------------------------------------------------------------------------------------------------------------------------------------------------------------------------------------------------------------------------------------------------------------------------------------------------------------------------------------------------------------------------------------------------------------------------------------------------------------------------------------------------------------------------------------------------------------------------------------------------------------------------|
| Journal:                        | <i>BMJ Open</i>                                                                                                                                                                                                                                                                                                                                                                                                                                                                                                                                                                                                                                                                                                                                                                                                                                                                                                                                                                                          |
| Manuscript ID                   | bmjopen-2018-025335.R3                                                                                                                                                                                                                                                                                                                                                                                                                                                                                                                                                                                                                                                                                                                                                                                                                                                                                                                                                                                   |
| Article Type:                   | Protocol                                                                                                                                                                                                                                                                                                                                                                                                                                                                                                                                                                                                                                                                                                                                                                                                                                                                                                                                                                                                 |
| Date Submitted by the Author:   | 11-Jan-2019                                                                                                                                                                                                                                                                                                                                                                                                                                                                                                                                                                                                                                                                                                                                                                                                                                                                                                                                                                                              |
| Complete List of Authors:       | González-Castro, Thelma; Universidad Juárez Autónoma de Tabasco, División Académica Multidisciplinaria de Jalpa de Méndez<br>Genis-Mendoza, Alma; Instituto Nacional de Medicina Genómica, Laboratorio de Genómica de Enfermedades Psiquiátrica y Neurodegenerativas<br>Tovilla-Zárte, Carlos; Universidad Juárez Autónoma de Tabasco, División Multidisciplinaria de Comalcalco, División Académica Multidisciplinaria de Comalcalco<br>Martínez Magaña, José Jaime; Instituto Nacional de Medicina Genómica, Laboratorio de Genómica de Enfermedades Psiquiátrica y Neurodegenerativas; Universidad Juárez Autónoma de Tabasco, División Académica de Ciencias de la Salud<br>Juárez-Rojop, Isela; Universidad Juárez Autónoma de Tabasco, División Académica de Ciencias de la Salud<br>Sarmiento, Emmanuel; Hospital Psiquiátrico Infantil Ramon de la Fuente Nicolini, Humberto; Instituto Nacional de Medicina Genómica, Laboratorio de Genómica de Enfermedades Psiquiátrica y Neurodegenerativas |
| <b>Primary Subject Heading</b>: | Genetics and genomics                                                                                                                                                                                                                                                                                                                                                                                                                                                                                                                                                                                                                                                                                                                                                                                                                                                                                                                                                                                    |
| Secondary Subject Heading:      | Mental health                                                                                                                                                                                                                                                                                                                                                                                                                                                                                                                                                                                                                                                                                                                                                                                                                                                                                                                                                                                            |
| Keywords:                       | Suicide & self-harm < PSYCHIATRY, MENTAL HEALTH, Schizophrenia & psychotic disorders < PSYCHIATRY, GENETICS                                                                                                                                                                                                                                                                                                                                                                                                                                                                                                                                                                                                                                                                                                                                                                                                                                                                                              |
|                                 |                                                                                                                                                                                                                                                                                                                                                                                                                                                                                                                                                                                                                                                                                                                                                                                                                                                                                                                                                                                                          |

SCHOLARONE™  
Manuscripts

1  
2  
3 **Genome-Wide Association Study of suicide attempt in a Mexican population:**  
4 **A study protocol**  
5

6 Thelma Beatriz González-Castro<sup>1</sup>, Alma Delia Genis-Mendoza<sup>2,3</sup>, Carlos Alfonso  
7 Tovilla-Zarate<sup>4</sup>, José Jaime Martínez-Magaña<sup>2</sup>, Isela Esther Juárez-Rojop<sup>5</sup>,  
8 Emmanuel Sarmiento<sup>3</sup>, Humberto Nicolini<sup>\*2,3</sup>  
9

10  
11 <sup>1</sup> División Académica Multidisciplinaria de Jalpa de Méndez; Universidad Juárez  
12 Autónoma de Tabasco. Jalpa de Méndez, Tabasco, México.

13 <sup>2</sup> Instituto Nacional de Medicina Genómica (INMEGEN); Secretaria de Salud.  
14 Ciudad de México.

15 <sup>3</sup> Hospital Psiquiátrico Infantil "Dr. Juan N. Navarro". Ciudad de México

16 <sup>4</sup> División Académica Multidisciplinaria de Comalcalco; Universidad Juárez  
17 Autónoma de Tabasco. Comalcalco, Tabasco, México.

18 <sup>5</sup> División Académica Multidisciplinaria de Ciencias de la Salud; Universidad  
19 Juárez Autónoma de Tabasco. Villahermosa, Tabasco, México.

20 <sup>a</sup> These authors contributed equally to this work  
21  
22

23  
24 TBGC: [thelma.glez.castro@gmail.com](mailto:thelma.glez.castro@gmail.com); CATZ: [alfonso\\_tovillaz@yahoo.com.mx](mailto:alfonso_tovillaz@yahoo.com.mx);  
25 JJMM: [jimy.10.06@gmail.com](mailto:jimy.10.06@gmail.com); IEJR: [iselajuarezrojop@hotmail.com](mailto:iselajuarezrojop@hotmail.com); ES:  
26 [emmanuelarmientoh@hotmail.com](mailto:emmanuelarmientoh@hotmail.com)  
27  
28

29  
30 TBGC and ADGM contributed equally to this paper  
31

32 \*Correspondence authors: Ph.D. Humberto Nicolini, National Institute of Genomic  
33 Medicine (INMEGEN), Psychiatric Care Services (SAP). Periférico Sur 4809,  
34 Arenal Tepepan, 14610, Mexico City, Mexico. Phone + 55 5350 1900. Email  
35 address: [hnicolini@inmegen.gob.mx](mailto:hnicolini@inmegen.gob.mx)  
36  
37  
38  
39

40 Word count: 1,850  
41  
42  
43  
44  
45  
46  
47  
48  
49  
50  
51  
52  
53  
54  
55  
56  
57  
58  
59  
60

## Abstract

*Introduction:* Suicidality is a complex behavior and a major health problem; the specific features that could predispose to suicidal behavior have been extensively investigated, most frequently in European and Asian populations. Therefore, our aim is to present a protocol that will explore suicide attempt in Mexican individuals diagnosed with psychiatric disorders, by performing a genome-wide association study.

*Method and analysis:* we will perform a GWAS on 700 individuals who have a history of suicide attempt, and compare them to subjects without suicide attempt history diagnostic (n=500). The genotyping will be conducted using the Infinium PsychArray BeadChip and quality controls will be applied to the SNPs genotyped. After that, we will perform the imputation using reference panels provided by the Haplotype Reference Consortium. We will perform two different workflows: A) the classic GWAS analysis applying the same weight to all the variants and B) an algorithm with prediction of deleteriousness of variants.

### *Ethics and dissemination*

This study was approved by the ethics and investigation commitments of the National Institute of Genomic Medicine on July 22<sup>nd</sup> 2015, No. CEI 215/13. We plan to disseminate research findings in scientific conferences and as a manuscript in peer-reviewed journals.

*Trial registration:* CEI 215/13

**Keywords:** suicide & self-harm; mental health; schizophrenia & psychotic disorders; genetics.

## Article summary

### Strengths and limitations of this study

- This will be the first study that aims to perform a genome wide association study to assess suicide attempt in a Mexican population.
- The methodological analysis will explore the hypothesis that there are genes that increase the risk of suicide attempt in Mexican population.
- Recruiting participants from three clinical centers in the country will give a more representative sample of the Mexican population.
- Identifying genetic variants associated with suicide attempt will improve our understanding of the biological underlying this disease and could be useful for future microarrays designed to study Latin American populations.
- As the Mexican population has a heterogeneous genetic background, a possible limitation of this study will be that heterogeneity might interfere in the interpretation of results.



## 1 Introduction

2 Suicide is one of the leading causes of death worldwide. Individuals  
3 diagnosed with a psychiatric disorder have higher rates of suicide compared to the  
4 general population, which emphasizes a narrow relationship between suicide and  
5 psychiatric disorders. In this line of evidence, a considerable majority of suicide  
6 victims have had an undiagnosed psychiatric disorder at the time of death<sup>1-3</sup>.  
7 Furthermore, several studies consider psychiatric disorders as one of the main risk  
8 factors of suicide. Unfortunately, up to today, the mechanisms that explain this  
9 relationship have not been fully disentangled<sup>4 5</sup>.

10 Suicidal behavior (SB), has been defined as a complex issue that results  
11 from the combination of genetic variants along with personal experiences and  
12 environmental contribution; altogether, these factors establish the disease  
13 symptomatology manifestation <sup>1 3 6</sup>. The results of studies based on twins,  
14 adoptions and families, support the heritability of SB, pinpointing a genetic  
15 influence<sup>7-10</sup>. Subsequently, many candidate-gene association studies have been  
16 performed, with the different phenotypes of SB: suicide attempts, suicide ideation  
17 and accomplished suicide <sup>1 3 6 11 12</sup>. Unfortunately, SB is a polygenic trait and  
18 candidate-gene association studies underestimate the genetic background. In an  
19 attempt to search for this polygenic variation of SB, other strategies have been  
20 developed, such as the genome-wide association studies (GWAS) <sup>6 13 14</sup>.

21 Over the past decade, a small number of GWAS exploring common genetic  
22 variation mostly in suicide attempters, have found significant associations between  
23 genetic components and SB, establishing possible molecular pathways involved in  
24 the susceptibility of the disease<sup>15 16</sup>. Although a genetic diathesis model for

1  
2  
3 25 predisposition to SB has been proposed and GWAS have suggested candidate loci  
4  
5 26 or pathways, the only information available comes from studies analyzing  
6  
7 27 Caucasians or Asians populations, leaving behind Latin American populations  
8  
9 28 including Mexicans<sup>17-21</sup>. Therefore, more studies are necessary in order to have a  
10  
11 29 better comprehension of the genetic background of SB.  
12  
13  
14  
15 30

### 16 17 31 Objective

18  
19 32 Our aim is to perform the first genome-wide association study of suicide  
20  
21 33 attempters in a Mexican population, in order to explore and define the involvement  
22  
23 34 of a genetic diathesis that predisposes to SB in this population. In addition, we will  
24  
25 35 explore the hypothesis that there are genes and genetic variants that increase the  
26  
27 36 risk of suicide attempt in Mexican population and these factors could be common in  
28  
29 37 individuals with a psychiatric diagnostic.  
30  
31  
32  
33  
34

### 35 39 **Methods and analysis**

#### 36 37 40 *Sample population and setting*

38  
39  
40 41 The case group (n=700) will be formed by individuals who have had at least one  
41  
42 42 suicide attempt, and this will be determined using Structured Clinical Interview for  
43  
44 43 DSM-IV (SCID-I and II) in the Psychiatry out-patient area from three clinical  
45  
46 44 centers: “Dr. Gustavo A. Roviroso” General Hospital in Tabasco, “Dr. Desiderio G.  
47  
48 45 Carbajal Regional Hospital in Tabasco, Mexico and “Dr. Juan N. Navarro”  
49  
50 46 Psychiatric Hospital in Mexico City. Individuals used as controls (n=500) will not  
51  
52 47 have current or past history of any suicidal behavior, with no first degree relatives  
53  
54 48 with a history of suicidal behavior and they will have to be unrelated to those in the  
55  
56  
57  
58  
59  
60

1  
2  
3 49 case group. Both cases and controls will be interviewed by two psychiatrist or  
4  
5 50 clinical specialists, together will determine the presence or absence of suicide  
6  
7 51 attempt. All individuals will be Mexican with Mexican ascendancy of at least two  
8  
9 52 generations (Mexican parents and grandparents); they will be recruited from  
10  
11 53 several Mexican hospitals and outpatient clinics.  
12  
13  
14  
15  
16

### 17 54 18 *Patient and Public Involvement*

19 56 The outcomes of the present protocol will be directly communicated to the patients  
20  
21 57 who participate or their legal caregivers. The results will also be discussed with  
22  
23 58 their psychiatrists and the corresponding health-education structures of the clinical  
24  
25 59 centers. However, the patients have not been directly participate in the study  
26  
27 60 design or any methodological procedures. Nevertheless, the authors of this  
28  
29 61 protocol have clinical experience with SB patients and their families, which helped  
30  
31 62 designed this study.  
32  
33  
34  
35  
36

### 37 63 38 *Ethics and dissemination*

39 64  
40 65 A written informed consent will be obtained from all individuals who accept  
41  
42 66 to participate. The study will be performed in accordance with the Helsinki  
43  
44 67 declaration (59th General Assembly, Seoul, Korea, October 2008). This study was  
45  
46 68 approved by the ethics and investigation commitments of the National Institute of  
47  
48 69 Genomic Medicine on July 22<sup>nd</sup> 2015, No. CEI 215/13. We plan to disseminate  
49  
50 70 research findings through scientific conferences and as a manuscript in peer-  
51  
52 71 reviewed journals.  
53  
54  
55  
56  
57  
58  
59  
60

1  
2  
3 73 *Clinical assessment*  
4

5 74 Diagnoses and clinical evaluations will be performed by at least two trained  
6  
7  
8 75 senior psychiatrists of whom at least one of them would have personally examined  
9  
10 76 the patient. All participants will undergo semi-structured interviews that will include  
11  
12 77 life-time and family history of suicidal behavior, among other clinical features.  
13  
14 78 Suicide attempt will be defined as a self-injurious act that had at least a partial  
15  
16  
17 79 intent to end one's life; the number of attempts, method used and medical damage  
18  
19 80 of past suicide attempts will be obtained.  
20

21  
22 81

23  
24 82 *Genotyping*  
25

26 83 The DNA will be isolated from peripheral blood leukocytes samples using a  
27  
28 84 standardized protocol of the Genomic Wizard Purification Kit from Promega, as  
29  
30 85 previously reported<sup>22-24</sup>. The integrity of genetic material will be checked on 1%  
31  
32 86 agarose gels and quantified by spectrophotometry using Nanodrop system.  
33  
34

35 87 The genotyping will be performed using the Infinium PsychArray BeadChip,  
36  
37 88 following the manufacturer's protocol <sup>25 26</sup>. This array contains approximately  
38  
39 89 580000 genetic variants, wherein include a set of genetic variants previously  
40  
41  
42 90 associated with a variety of psychiatric illnesses. All genotyping analyses will be  
43  
44 91 performed at the National Institute of Genomic Medicine (INMEGEN). For quality  
45  
46 92 controls, we will filter-out samples and variants with call rates lower than 98% and  
47  
48 93 variants deviating from Hardy-Weinberg equilibrium, with a chi-square p-value <  
49  
50 94  $1 \times 10^{-6}$ . The concordance between gender will be performed based on the  
51  
52 95 heterozygosity of the X and Y chromosomes. All the filtering processes will be  
53  
54 96 performed using the PLINK v1.9 software <sup>27</sup>. After that, we will perform a  
55  
56  
57  
58  
59  
60

1  
2  
3 97 multidimensional scaling (MDS) analysis in PLINK, all SNPs that pass quality  
4  
5 98 controls will be pruned and used to check population stratification in order to  
6  
7 99 evaluate the ancestry of individuals included. After the MDS analysis, the first five  
8  
9  
10 100 components will be used as covariates in the association analysis. MDS  
11  
12 101 dimensions will be graphically represented using the “MDS-plot” option. After  
13  
14 102 quality control procedures, we will perform the imputation using the reference  
15  
16 103 panels provided by the Haplotype Reference Consortium r.1.1; we will use the  
17  
18 104 Michigan Imputation Server for the imputation<sup>28 29</sup>.

105

#### 106 *Polygenic risk score calculation (PRS)*

107 PRS is a measurement of genetic liability to schizophrenia based on the  
108 Psychiatric Genomics Consortium (PGC) schizophrenia GWAS<sup>30</sup>. SNPs will be  
109 selected to be included in the PRS calculation based on p values obtained in the  
110 original PGC GWAS using PRSice<sup>31</sup>. PRS will be used to test an association with  
111 suicide attempt using linear regression models adjusted by age, sex, and four  
112 multidimensional-scaling components (MDS). The estimation of gene- or set-based  
113 association tests using GWAS summary data, will be performed using Genome-  
114 wide Complex Trait Analysis (GCTA)<sup>32 33</sup>.

115

#### 116 *Statistical analyses*

117 In order to evaluate the effect of genetic variants on suicidal behavior, we  
118 will perform two different workflows: A) a classic GWAS analysis applying the same  
119 importance to all the variants and B) an algorithm with prediction of  
120 deleteriousness of the variants. Concerning the first workflow, we will conduct a

1  
2  
3 121 mixed linear model analysis on imputed variants with a minor allele frequency of  
4  
5 122 5%. The implementation of linear mixed models will be performed on the GCTA  
6  
7 123 software<sup>34</sup>. For the second workflow, will include a prediction of the deliriousness  
8  
9  
10 124 of variants using different prediction algorithms, such as PolyPhen, SIFT, CADD,  
11  
12 125 VEP and ENCODE<sup>35-39</sup>. After the prediction of the functional impact of the  
13  
14 126 variants, we will compare the cases allele frequency of loss-of-function, missense  
15  
16 127 with deleterious effect, variants present in regulatory regions and variants with a  
17  
18 128 PHRED-CADD score higher than 20, with the allele frequency of the populations  
19  
20 129 reported in the 1000 genomes and ExAC database. GWAS analysis will be  
21  
22 130 performed on cases with a history of suicide attempts and compared to non-suicide  
23  
24 131 attempters. Genome wide significance will be set at  $P < 5 \times 10^{-08}$  .  
25  
26  
27  
28  
29

### 133 *Power analysis calculation*

30  
31  
32  
33 134 For GWAS analysis, we performed power calculations in QUANTO 1.2.4  
34  
35 135 (<http://biostats.usc.edu/software>). The analysis uses a log additive model of  
36  
37 136 inheritance to detect a power of 0.82 at significance threshold  $5 \times 10^{-08}$  to detect an  
38  
39 137 effect size of  $OR \geq 1.8$  with a  $P_0$  of 0.08 and MAF of 0.25, as in a previous study<sup>14</sup>.  
40  
41 138 The  $P_0$  that we used is the baseline risk of suicide attempt in our population based  
42  
43 139 on previous reports<sup>40 41</sup>. Therefore, our study will be powered to detect genetics  
44  
45 140 effects.  
46  
47  
48  
49  
50

51 141

52 142

53 143

54 144

## 145 **Discussion**

146 Various situations and contexts have been proposed as predictors of  
147 suicidal behavior; among them, the presence of a psychiatric disorder seems to be  
148 an important determinant for such behavior. Likewise, the possible predisposition  
149 of a genetic background to manifest SB has been supported by several  
150 investigations, but the understanding of the precise genetic system that causes  
151 such vulnerability to suicidal tendencies is still largely incomplete. Hence, the  
152 principal aim of our protocol study is to explore the potential genetic influence on  
153 SB in a Mexican population, throughout a genome-wide association study. In  
154 addition, we want to emphasize that to our knowledge, this study protocol will be  
155 the first one to evaluate suicidal behavior in patients with schizophrenia and bipolar  
156 disorder in a Mexican population.

157 The majority of the genetic epidemiology evidence suggest that suicidal  
158 behavior is a complex issue, where there are multiple genes that have a small  
159 effect over SB; but if combined, could become predisposing factors. Therefore,  
160 association studies that detect small effect contributions can be more useful, which  
161 is a strength of this protocol. In this sense, one of the most powerful strengths of  
162 the GWAS is that it uses many genetic markers across the whole genome to  
163 search for associations with a particular disease; as it is based on no prior  
164 assumptions, it explores a large number of genetic variants. For these reasons, we  
165 will use GWAS to explore the genetic influence on suicidal behavior in  
166 schizophrenics with and without SA, bipolar patients with and without SA, suicide  
167 attempters and healthy subjects as controls. Therefore, the results of this study will

1  
2  
3 168 provide information to better comprehend the influence of the genetic background  
4  
5 169 on the development of suicidal behavior, among psychiatric patients.  
6  
7 170 Additionally, the findings of the present research could provide valuable information  
8  
9 171 for future researches who attempt to identify genetic risk factors of suicidal  
10  
11 172 behavior, and help detect and/or treat this disease. Nowadays, there are  
12  
13 173 microarrays that have been used to study several genetic variables in Caucasian  
14  
15 174 and Asian populations; but to our knowledge, there is no evidence reported of  
16  
17 175 GWAS in studies that evaluate suicidal behavior in psychiatric patients. Therefore,  
18  
19 176 the outcomes of the study derived of the current protocol, could provide essential  
20  
21 177 information. The use of this type of genetic tools will allow us to identify associated  
22  
23 178 SNPs, missense and insertions and indels in mental illnesses such as  
24  
25 179 schizophrenia and bipolar disorder, as well as their possible participation as  
26  
27 180 predictors of suicidal behavior in a Mexican population. Consequently, these  
28  
29 181 findings could give important information to improve the design of future chips for  
30  
31 182 molecular diagnosis of psychiatric disorders in Mexicans, which will be very useful  
32  
33 183 in the prevention, diagnosis and prognosis of suicidal behavior in Mexico.  
34  
35  
36  
37  
38  
39

40 184 In conclusion, the completion of the present protocol could impulse the  
41  
42 185 design of a microarray that includes associated variants to SB in Mexican  
43  
44 186 population. Moreover, the findings will give a better perspective of the participation  
45  
46 187 of the genetic background as a predictor of suicidal behavior in psychiatric  
47  
48 188 diseases. Hence, the outcomes would be useful in genetic research, as well as in  
49  
50 189 prevention and early diagnosis of suicidal behavior in Mexicans  
51  
52  
53  
54  
55  
56  
57  
58  
59  
60



1  
2  
3 191 **Ethics and disseminations:**  
4

5 192 The study will be conducted in compliance with local regulations and internationally  
6  
7 193 established principles of the Declaration of Helsinki (59th General Assembly,  
8  
9 194 Seoul, Korea, October 2008). This study was approved by the ethics and  
10  
11 195 investigation commitments of the National Institute of Genomic Medicine on July  
12  
13 196 22nd 2015, No. CEI 215/13. Before inclusion, all patients are required to sign an  
14  
15 197 informed consent form.  
16  
17  
18

19 198

20  
21 199 **Consent for publication:**  
22

23 200 Not applicable.  
24  
25

26 201

27  
28 202 **Availability of data and material:**  
29

30 203 Not applicable.  
31  
32

33 204

34  
35 205 **Competing interest statement:**  
36

37 206 The authors declare to have no competing interests.  
38  
39

40 207

41  
42 208 **Funding statement:**  
43

44 209 This protocol will receive the support of INMEGEN project number 23/2015/I via  
45  
46 210 Humberto Nicolini.  
47  
48

49 211

50  
51 212 **Author contributions:**  
52

53 213 ADGM, HN and JJMM conceived the study, participated in its design, helped to  
54  
55 214 draft the manuscript and mentored TBGC. CATZ, ADGM and JJMM critically  
56  
57  
58  
59

1  
2  
3 215 revised successive drafts of the manuscript and provided important intellectual  
4  
5 216 input. CATZ and TBGC coordinated and supervised the integration of the  
6  
7 217 manuscript. ES, IEJR, HN and ADGM contributed to developing the analytic plan  
8  
9 218 proposed for this study. All authors read and approved the final manuscript.  
10  
11

12 219

## 14 220 **Acknowledgements**

15  
16  
17 221 The protocol study will be a doctoral thesis of TBGC.  
18  
19 222

20 223

21 224

22 225

23 226

24 227

25 228

26 229

27 230

28 231

29 232

30 233

31 234

32 235

33 236

34 237

35 238

36  
37  
38  
39  
40  
41  
42  
43  
44  
45  
46  
47  
48  
49  
50  
51  
52  
53  
54  
55  
56  
57  
58  
59  
60

239 **References**

- 240 1. Perlis RH, Huang J, Purcell S, et al. Genome-wide association study of suicide attempts in mood  
241 disorder patients. *The American journal of psychiatry* 2010;167(12):1499-507. doi:  
242 10.1176/appi.ajp.2010.10040541 [published Online First: 2010/11/03]
- 243 2. Pulay AJ, Rethelyi JM. Multimarker analysis suggests the involvement of BDNF signaling and  
244 microRNA biosynthesis in suicidal behavior. *American journal of medical genetics Part B,*  
245 *Neuropsychiatric genetics : the official publication of the International Society of*  
246 *Psychiatric Genetics* 2016;171(6):763-76. doi: 10.1002/ajmg.b.32433 [published Online  
247 First: 2016/02/28]
- 248 3. Mullins N, Perroud N, Uher R, et al. Genetic relationships between suicide attempts, suicidal  
249 ideation and major psychiatric disorders: a genome-wide association and polygenic scoring  
250 study. *American journal of medical genetics Part B, Neuropsychiatric genetics : the official*  
251 *publication of the International Society of Psychiatric Genetics* 2014;165B(5):428-37. doi:  
252 10.1002/ajmg.b.32247 [published Online First: 2014/06/26]
- 253 4. Perroud N, Uher R, Ng MY, et al. Genome-wide association study of increasing suicidal ideation  
254 during antidepressant treatment in the GENDEP project. *Pharmacogenomics J*  
255 2012;12(1):68-77. doi: 10.1038/tpj.2010.70 [published Online First: 2010/09/30]
- 256 5. Stein MB, Ware EB, Mitchell C, et al. Genomewide association studies of suicide attempts in US  
257 soldiers. *American journal of medical genetics Part B, Neuropsychiatric genetics : the*  
258 *official publication of the International Society of Psychiatric Genetics* 2017;174(8):786-97.  
259 doi: 10.1002/ajmg.b.32594 [published Online First: 2017/09/14]
- 260 6. Sokolowski M, Wasserman J, Wasserman D. Rare CNVs in Suicide Attempt include  
261 Schizophrenia-Associated Loci and Neurodevelopmental Genes: A Pilot Genome-Wide and  
262 Family-Based Study. *PloS one* 2016;11(12):e0168531. doi: 10.1371/journal.pone.0168531  
263 [published Online First: 2016/12/29]
- 264 7. Levine SZ, Goldberg Y, Yoffe R, et al. Suicide attempts in a national population of twins  
265 concordant for psychoses. *European neuropsychopharmacology : the journal of the*  
266 *European College of Neuropsychopharmacology* 2014;24(8):1203-9. doi:  
267 10.1016/j.euroneuro.2014.05.014 [published Online First: 2014/06/28]
- 268 8. Linker J, Gillespie NA, Maes H, et al. Suicidal ideation, depression, and conduct disorder in a  
269 sample of adolescent and young adult twins. *Suicide & life-threatening behavior*  
270 2012;42(4):426-36. doi: 10.1111/j.1943-278X.2012.00101.x [published Online First:  
271 2012/06/01]
- 272 9. Petersen L, Sorensen TI, Kragh Andersen P, et al. Genetic and familial environmental effects on  
273 suicide attempts: a study of Danish adoptees and their biological and adoptive siblings.  
274 *Journal of affective disorders* 2014;155:273-7. doi: 10.1016/j.jad.2013.11.012 [published  
275 Online First: 2013/12/05]
- 276 10. Roy A, Rylander G, Sarchiapone M. Genetics of suicides. Family studies and molecular genetics.  
277 *Annals of the New York Academy of Sciences* 1997;836:135-57. [published Online First:  
278 1998/06/09]
- 279 11. Mirkovic B, Cohen D, Laurent C, et al. A case-control association study of 12 candidate genes  
280 and attempted suicide in French adolescents. *International journal of adolescent medicine*  
281 *and health* 2017 doi: 10.1515/ijamh-2017-0089 [published Online First: 2017/09/14]
- 282 12. Tombacz D, Maroti Z, Kalmar T, et al. High-Coverage Whole-Exome Sequencing Identifies  
283 Candidate Genes for Suicide in Victims with Major Depressive Disorder. *Scientific reports*  
284 2017;7(1):7106. doi: 10.1038/s41598-017-06522-3 [published Online First: 2017/08/05]

- 1  
2  
3 285 13. Gross JA, Bureau A, Croteau J, et al. A genome-wide copy number variant study of suicidal  
4 286 behavior. *PLoS one* 2015;10(5):e0128369. doi: 10.1371/journal.pone.0128369 [published  
5 287 Online First: 2015/05/27]  
6 288 14. Galfalvy H, Haghghi F, Hodgkinson C, et al. A genome-wide association study of suicidal  
7 289 behavior. *American journal of medical genetics Part B, Neuropsychiatric genetics : the*  
8 290 *official publication of the International Society of Psychiatric Genetics* 2015;168(7):557-63.  
9 291 doi: 10.1002/ajmg.b.32330 [published Online First: 2015/06/17]  
10 292 15. Galfalvy H, Zalsman G, Huang YY, et al. A pilot genome wide association and gene expression  
11 293 array study of suicide with and without major depression. *The world journal of biological*  
12 294 *psychiatry : the official journal of the World Federation of Societies of Biological Psychiatry*  
13 295 2013;14(8):574-82. doi: 10.3109/15622975.2011.597875 [published Online First:  
14 296 2011/11/09]  
15 297 16. Laje G, Allen AS, Akula N, et al. Genome-wide association study of suicidal ideation emerging  
16 298 during citalopram treatment of depressed outpatients. *Pharmacogenet Genomics*  
17 299 2009;19(9):666-74. doi: 10.1097/FPC.0b013e32832e4bcd [published Online First:  
18 300 2009/09/03]  
19 301 17. Zai CC, Goncalves VF, Tiwari AK, et al. A genome-wide association study of suicide severity  
20 302 scores in bipolar disorder. *Journal of psychiatric research* 2015;65:23-9. doi:  
21 303 10.1016/j.jpsychires.2014.11.002 [published Online First: 2015/04/29]  
22 304 18. Menke A, Domschke K, Czamara D, et al. Genome-wide association study of antidepressant  
23 305 treatment-emergent suicidal ideation. *Neuropsychopharmacology : official publication of*  
24 306 *the American College of Neuropsychopharmacology* 2012;37(3):797-807. doi:  
25 307 10.1038/npp.2011.257 [published Online First: 2011/10/28]  
26 308 19. Bani-Fatemi A, Graff A, Zai C, et al. GWAS analysis of suicide attempt in schizophrenia: Main  
27 309 genetic effect and interaction with early life trauma. *Neurosci Lett* 2016;622:102-6. doi:  
28 310 10.1016/j.neulet.2016.04.043 [published Online First: 2016/04/26]  
29 311 20. Schosser A, Butler AW, Ising M, et al. Genomewide association scan of suicidal thoughts and  
30 312 behaviour in major depression. *PLoS one* 2011;6(7):e20690. doi:  
31 313 10.1371/journal.pone.0020690 [published Online First: 2011/07/14]  
32 314 21. Willour VL, Seifuddin F, Mahon PB, et al. A genome-wide association study of attempted  
33 315 suicide. *Molecular psychiatry* 2012;17(4):433-44. doi: 10.1038/mp.2011.4 [published  
34 316 Online First: 2011/03/23]  
35 317 22. Gonzalez-Castro TB, Nicolini H, Lanzagorta N, et al. The role of brain-derived neurotrophic  
36 318 factor (BDNF) Val66Met genetic polymorphism in bipolar disorder: a case-control study,  
37 319 comorbidities, and meta-analysis of 16,786 subjects. *Bipolar disorders* 2015;17(1):27-38.  
38 320 doi: 10.1111/bdi.12227 [published Online First: 2014/07/22]  
39 321 23. Gonzalez-Castro TB, Tovilla-Zarate C, Juarez-Rojop I, et al. Association of the 5HTR2A gene with  
40 322 suicidal behavior: case-control study and updated meta-analysis. *BMC psychiatry*  
41 323 2013;13:25. doi: 10.1186/1471-244x-13-25 [published Online First: 2013/01/15]  
42 324 24. Gonzalez-Castro TB, Tovilla-Zarate CA, Juarez-Rojop I, et al. Association of 5HTR1A gene  
43 325 variants with suicidal behavior: case-control study and updated meta-analysis. *Journal of*  
44 326 *psychiatric research* 2013;47(11):1665-72. doi: 10.1016/j.jpsychires.2013.04.011  
45 327 [published Online First: 2013/08/06]  
46 328 25. Guo Y, He J, Zhao S, et al. Illumina human exome genotyping array clustering and quality  
47 329 control. *Nature protocols* 2014;9(11):2643-62. doi: 10.1038/nprot.2014.174 [published  
48 330 Online First: 2014/10/17]  
49 331 26. Borges G, Orozco R, Medina Mora ME. [Risk index for attempted suicide in Mexico]. *Salud*  
50 332 *publica de Mexico* 2012;54(6):595-606. [published Online First: 2013/01/16]  
51  
52  
53  
54  
55  
56  
57  
58  
59  
60

- 1  
2  
3 333 27. Chang CC, Chow CC, Tellier LC, et al. Second-generation PLINK: rising to the challenge of larger  
4 334 and richer datasets. *GigaScience* 2015;4:7. doi: 10.1186/s13742-015-0047-8 [published  
5 335 Online First: 2015/02/28]  
6 336 28. Loh PR, Danecek P, Palamara PF, et al. Reference-based phasing using the Haplotype Reference  
7 337 Consortium panel. *Nat Genet* 2016;48(11):1443-48. doi: 10.1038/ng.3679 [published  
8 338 Online First: 2016/10/28]  
9 339 29. McCarthy S, Das S, Kretzschmar W, et al. A reference panel of 64,976 haplotypes for genotype  
10 340 imputation. *Nat Genet* 2016;48(10):1279-83. doi: 10.1038/ng.3643 [published Online First:  
11 341 2016/08/23]  
12 342 30. Biological insights from 108 schizophrenia-associated genetic loci. *Nature* 2014;511(7510):421-  
13 343 7. doi: 10.1038/nature13595 [published Online First: 2014/07/25]  
14 344 31. Euesden J, Lewis CM, O'Reilly PF. PRSice: Polygenic Risk Score software. *Bioinformatics*  
15 345 2015;31(9):1466-8. doi: 10.1093/bioinformatics/btu848 [published Online First:  
16 346 2015/01/01]  
17 347 32. Yang J, Lee SH, Goddard ME, et al. GCTA: a tool for genome-wide complex trait analysis. *Am J*  
18 348 *Hum Genet* 2011;88(1):76-82. doi: 10.1016/j.ajhg.2010.11.011 [published Online First:  
19 349 2010/12/21]  
20 350 33. Bakshi A, Zhu Z, Vinkhuyzen AA, et al. Fast set-based association analysis using summary data  
21 351 from GWAS identifies novel gene loci for human complex traits. *Sci Rep* 2016;6:32894. doi:  
22 352 10.1038/srep32894 [published Online First: 2016/09/09]  
23 353 34. Yang J, Lee SH, Goddard ME, et al. Genome-wide complex trait analysis (GCTA): methods, data  
24 354 analyses, and interpretations. *Methods in molecular biology (Clifton, NJ)* 2013;1019:215-  
25 355 36. doi: 10.1007/978-1-62703-447-0\_9 [published Online First: 2013/06/13]  
26 356 35. Adzhubei I, Jordan DM, Sunyaev SR. Predicting functional effect of human missense mutations  
27 357 using PolyPhen-2. *Current protocols in human genetics* 2013;Chapter 7:Unit7.20. doi:  
28 358 10.1002/0471142905.hg0720s76 [published Online First: 2013/01/15]  
29 359 36. Ng PC, Henikoff S. Predicting deleterious amino acid substitutions. *Genome research*  
30 360 2001;11(5):863-74. doi: 10.1101/gr.176601 [published Online First: 2001/05/05]  
31 361 37. McLaren W, Gil L, Hunt SE, et al. The Ensembl Variant Effect Predictor. *Genome biology*  
32 362 2016;17(1):122. doi: 10.1186/s13059-016-0974-4 [published Online First: 2016/06/09]  
33 363 38. An integrated encyclopedia of DNA elements in the human genome. *Nature*  
34 364 2012;489(7414):57-74. doi: 10.1038/nature11247 [published Online First: 2012/09/08]  
35 365 39. Kircher M, Witten DM, Jain P, et al. A general framework for estimating the relative  
36 366 pathogenicity of human genetic variants. 2014;46(3):310-5. doi: 10.1038/ng.2892  
37 367 40. Romero-Pimentel AL, Mendoza-Morales RC, Fresan A, et al. Demographic and Clinical  
38 368 Characteristics of Completed Suicides in Mexico City 2014-2015. *Front Psychiatry*  
39 369 2018;9:402. doi: 10.3389/fpsy.2018.00402 [published Online First: 2018/09/25]  
40 370 41. Bachmann S. Epidemiology of Suicide and the Psychiatric Perspective. *International journal of*  
41 371 *environmental research and public health* 2018;15(7) doi: 10.3390/ijerph15071425  
42 372 [published Online First: 2018/07/11]  
43 373

# BMJ Open

## Genome-Wide Association Study of suicide attempt in a Mexican population: A study protocol

|                                 |                                                                                                                                                                                                                                                                                                                                                                                                                                                                                                                                                                                                                                                                                                                                                                                                                                                                                                                                                                                                          |
|---------------------------------|----------------------------------------------------------------------------------------------------------------------------------------------------------------------------------------------------------------------------------------------------------------------------------------------------------------------------------------------------------------------------------------------------------------------------------------------------------------------------------------------------------------------------------------------------------------------------------------------------------------------------------------------------------------------------------------------------------------------------------------------------------------------------------------------------------------------------------------------------------------------------------------------------------------------------------------------------------------------------------------------------------|
| Journal:                        | <i>BMJ Open</i>                                                                                                                                                                                                                                                                                                                                                                                                                                                                                                                                                                                                                                                                                                                                                                                                                                                                                                                                                                                          |
| Manuscript ID                   | bmjopen-2018-025335.R4                                                                                                                                                                                                                                                                                                                                                                                                                                                                                                                                                                                                                                                                                                                                                                                                                                                                                                                                                                                   |
| Article Type:                   | Protocol                                                                                                                                                                                                                                                                                                                                                                                                                                                                                                                                                                                                                                                                                                                                                                                                                                                                                                                                                                                                 |
| Date Submitted by the Author:   | 25-Jan-2019                                                                                                                                                                                                                                                                                                                                                                                                                                                                                                                                                                                                                                                                                                                                                                                                                                                                                                                                                                                              |
| Complete List of Authors:       | González-Castro, Thelma; Universidad Juárez Autónoma de Tabasco, División Académica Multidisciplinaria de Jalpa de Méndez<br>Genis-Mendoza, Alma; Instituto Nacional de Medicina Genómica, Laboratorio de Genómica de Enfermedades Psiquiátrica y Neurodegenerativas<br>Tovilla-Zárte, Carlos; Universidad Juárez Autónoma de Tabasco, División Multidisciplinaria de Comalcalco, División Académica Multidisciplinaria de Comalcalco<br>Martínez Magaña, José Jaime; Instituto Nacional de Medicina Genómica, Laboratorio de Genómica de Enfermedades Psiquiátrica y Neurodegenerativas; Universidad Juárez Autónoma de Tabasco, División Académica de Ciencias de la Salud<br>Juárez-Rojop, Isela; Universidad Juárez Autónoma de Tabasco, División Académica de Ciencias de la Salud<br>Sarmiento, Emmanuel; Hospital Psiquiátrico Infantil Ramon de la Fuente Nicolini, Humberto; Instituto Nacional de Medicina Genómica, Laboratorio de Genómica de Enfermedades Psiquiátrica y Neurodegenerativas |
| <b>Primary Subject Heading</b>: | Genetics and genomics                                                                                                                                                                                                                                                                                                                                                                                                                                                                                                                                                                                                                                                                                                                                                                                                                                                                                                                                                                                    |
| Secondary Subject Heading:      | Mental health                                                                                                                                                                                                                                                                                                                                                                                                                                                                                                                                                                                                                                                                                                                                                                                                                                                                                                                                                                                            |
| Keywords:                       | Suicide & self-harm < PSYCHIATRY, MENTAL HEALTH, Schizophrenia & psychotic disorders < PSYCHIATRY, GENETICS                                                                                                                                                                                                                                                                                                                                                                                                                                                                                                                                                                                                                                                                                                                                                                                                                                                                                              |
|                                 |                                                                                                                                                                                                                                                                                                                                                                                                                                                                                                                                                                                                                                                                                                                                                                                                                                                                                                                                                                                                          |

SCHOLARONE™  
Manuscripts

1  
2  
3 **Genome-Wide Association Study of suicide attempt in a Mexican population:**  
4 **A study protocol**  
5

6 Thelma Beatriz González-Castro<sup>1</sup>, Alma Delia Genis-Mendoza<sup>2,3</sup>, Carlos Alfonso  
7 Tovilla-Zarate<sup>4</sup>, José Jaime Martínez-Magaña<sup>2</sup>, Isela Esther Juárez-Rojop<sup>5</sup>,  
8 Emmanuel Sarmiento<sup>3</sup>, Humberto Nicolini<sup>\*2,3</sup>  
9

10  
11 <sup>1</sup> División Académica Multidisciplinaria de Jalpa de Méndez; Universidad Juárez  
12 Autónoma de Tabasco. Jalpa de Méndez, Tabasco, México.

13 <sup>2</sup> Instituto Nacional de Medicina Genómica (INMEGEN); Secretaria de Salud.  
14 Ciudad de México.

15 <sup>3</sup> Hospital Psiquiátrico Infantil "Dr. Juan N. Navarro". Ciudad de México

16 <sup>4</sup> División Académica Multidisciplinaria de Comalcalco; Universidad Juárez  
17 Autónoma de Tabasco. Comalcalco, Tabasco, México.

18 <sup>5</sup> División Académica Multidisciplinaria de Ciencias de la Salud; Universidad  
19 Juárez Autónoma de Tabasco. Villahermosa, Tabasco, México.

20 <sup>a</sup> These authors contributed equally to this work  
21  
22

23  
24 TBGC: thelma.glez.castro@gmail.com; CATZ: alfonso\_tovillaz@yahoo.com.mx;  
25 JJMM: jimy.10.06@gmail.com; IEJR: iselajuarezrojop@hotmail.com; ES:  
26 emmanuelssarmiento@hotmail.com  
27  
28

29  
30 TBGC and ADGM contributed equally to this paper  
31

32 \*Correspondence authors: Ph.D. Humberto Nicolini, National Institute of Genomic  
33 Medicine (INMEGEN), Psychiatric Care Services (SAP). Periférico Sur 4809,  
34 Arenal Tepepan, 14610, México City, México. Phone + 55 5350 1900. Email  
35 address: hnicolini@inmegen.gob.mx  
36  
37

38  
39  
40 Word count: 1,850  
41  
42  
43  
44  
45  
46  
47  
48  
49  
50  
51  
52  
53  
54  
55  
56  
57  
58  
59  
60

## Abstract

*Introduction:* Suicidality is a complex behavior and a major health problem; the specific features that could predispose to suicidal behavior have been extensively investigated, most frequently in European and Asian populations. Therefore, our aim is to present a protocol that will explore suicide attempt in Mexican individuals diagnosed with psychiatric disorders, through a genome-wide association study.

*Method and analysis:* we will perform a GWAS by comparing 700 individuals who have suicide attempt history, with control subjects without suicide attempt history (n=500). The genotyping will be conducted using the Infinium PsychArray BeadChip and quality controls will be applied to SNPs genotyped. After that, we will perform the imputation using reference panels provided by the Haplotype Reference Consortium. We will perform two different workflows: A) the classic GWAS analysis applying the same weight to all the variants and B) an algorithm with prediction of deleteriousness of variants.

### *Ethics and dissemination*

This study was approved by the ethics and investigation committees of the National Institute of Genomic Medicine on July 22<sup>nd</sup> 2015, No. CEI 215/13. We plan to disseminate research findings in scientific conferences and as a manuscript in peer-reviewed journals.

*Trial registration:* CEI 215/13

**Keywords:** suicide & self-harm; mental health; schizophrenia & psychotic disorders; genetics.



## Article summary

### Strengths and limitations of this study

- This will be the first study that aims to perform a genome wide association study to assess suicide attempt in a Mexican population.
- The methodological analysis will explore the hypothesis that there are genes that increase the risk of suicide attempt in Mexican population.
- Recruiting participants from three clinical centers in the country will give a more representative sample of the Mexican population.
- Identifying genetic variants associated with suicide attempt will improve our understanding of the biology underlying this disorder and could be useful for future microarrays designed to study Latin American populations.
- As the Mexican population has a heterogeneous genetic background, a possible limitation of this study will be that heterogeneity might interfere in the interpretation of results.

## 1 Introduction

2 Suicide is one of the leading causes of death worldwide. Individuals  
3 diagnosed with psychiatric disorders have higher rates of suicide compared with the  
4 general population, which emphasizes a narrow relationship between suicide and  
5 psychiatric disorders. In this line of evidence, a considerable majority of suicide  
6 victims have had an undiagnosed psychiatric disorder at the time of death<sup>1-3</sup>.  
7 Furthermore, several studies consider psychiatric disorders as one of the main risk  
8 factors of suicide. Unfortunately, up to today, the mechanisms of this relationship  
9 have not been fully disentangled<sup>4 5</sup>.

10 Suicidal behavior (SB), has been defined as a complex issue that results from  
11 the combination of genetic variants along with personal experiences and  
12 environmental contribution; altogether, these factors establish the disease  
13 symptomatology manifestation<sup>1 3 6</sup>. The results of studies based on twins, adoptions  
14 and families, support the heritability of SB, pinpointing a genetic influence<sup>7-10</sup>.  
15 Subsequently, many candidate-gene association studies have been performed,  
16 studying the different phenotypes of SB: suicide attempts, suicide ideation and  
17 accomplished suicide<sup>1 3 6 11 12</sup>. Unfortunately, SB is a polygenic trait and candidate-  
18 gene association studies underestimate the genetic background. In an attempt to  
19 search for this polygenic variation of SB, other strategies have been developed, such  
20 as the genome-wide association studies (GWAS)<sup>6 13 14</sup>.

21 Over the past decade, a small number of GWAS exploring common genetic  
22 variation mostly in suicide attempters, have found significant associations between  
23 genetic components and SB, establishing possible molecular pathways involved in  
24 the susceptibility of the disease<sup>15 16</sup>. Although a genetic diathesis model for SB

1  
2  
3 25 predisposition has been proposed and GWAS have suggested candidate loci or  
4  
5 26 pathways, the only information available comes from studies analyzing Caucasian  
6  
7 27 or Asian populations, leaving behind Latin American populations including  
8  
9 28 Mexicans<sup>17-21</sup>. Therefore, more studies are necessary to have a better  
10  
11 29 comprehension of the SB genetic background.  
12  
13  
14  
15 30

## 16 17 31 Objectives

18  
19 32 Our aim is to perform the first genome-wide association study of suicide  
20  
21 33 attempters in a Mexican population, in order to explore and define the involvement  
22  
23 34 of a genetic diathesis that predisposes to SB in this population. In addition, we will  
24  
25 35 explore the hypothesis that there are genes and genetic variants that increase the  
26  
27 36 risk of suicide attempt in Mexican population and these factors could be common in  
28  
29 37 individuals with a psychiatric diagnostic.  
30  
31  
32  
33  
34

## 35 39 **Methods and analysis**

### 36 37 40 *Sample population and setting*

38  
39  
40 41 The case group (n=700) will be formed by individuals who have had at least one  
41  
42 42 suicide attempt, and this will be determined using the Structured Clinical Interview  
43  
44 43 for DSM-IV (SCID-I and II) in Psychiatry out-patient areas from three clinical centers:  
45  
46 44 “Dr. Gustavo A. Rovirosa” General Hospital in Tabasco, “Dr. Desiderio G. Carbajal  
47  
48 45 Regional Hospital in Tabasco, Mexico and “Dr. Juan N. Navarro” Psychiatric Hospital  
49  
50 46 in Mexico City. Individuals used as controls (n=500) will not have current or past  
51  
52 47 history of any suicidal behavior, will not have first degree relatives with suicidal  
53  
54 48 behavior history and they will be unrelated to those in the case group. Both cases  
55  
56  
57  
58  
59  
60

1  
2  
3 49 and controls will be interviewed by two psychiatrist or clinical specialists, together  
4  
5 50 they will determine the presence or absence of suicide attempt. All individuals will  
6  
7 51 be Mexicans with Mexican ascendancy of at least two generations (Mexican parents  
8  
9 52 and grandparents); they will be recruited from several hospitals and outpatient clinics  
10  
11 53 in Mexico.  
12  
13  
14  
15

#### 16 17 54 18 19 55 *Patient and Public Involvement*

20  
21 56 The outcomes of the present protocol will be directly communicated to patients who  
22  
23 57 participate or their legal caregivers. The results will also be discussed with their  
24  
25 58 psychiatrists and the corresponding health-education structures of the clinical  
26  
27 59 centers. However, the patients have not directly participated in the study design or  
28  
29 60 any methodological procedures.  
30  
31  
32

#### 33 61 34 62 *Ethics and dissemination*

35 63 A written informed consent will be obtained from all individuals who accept to  
36  
37 64 participate. The study will be performed in accordance with the Helsinki declaration  
38  
39 65 (59th General Assembly, Seoul, Korea, October 2008). This study has been already  
40  
41 66 approved by the ethics and investigation committees of the National Institute of  
42  
43 67 Genomic Medicine on July 22<sup>nd</sup> 2015, No. CEI 215/13. We plan to disseminate  
44  
45 68 research findings in scientific conferences and as a manuscript in peer-reviewed  
46  
47 69 journals.  
48  
49  
50

#### 51 70 52 53 71 *Clinical assessment*

1  
2  
3 72 Diagnoses and clinical evaluations will be performed by at least two trained  
4  
5 73 senior psychiatrists of whom at least one of them would have personally examined  
6  
7 74 the patient. All participants will undergo semi-structured interviews that will include  
8  
9  
10 75 life-time and family history of suicidal behavior, among other clinical features. Suicide  
11  
12 76 attempt will be defined as a self-injurious act that had at least a partial intent to end  
13  
14 77 one's life; the number of attempts, method used and medical damage of past suicide  
15  
16 78 attempts will be gathered.  
17  
18  
19 79

### 20 21 80 *Genotyping*

22  
23  
24 81 DNA will be isolated from peripheral blood leukocytes samples using a  
25  
26 82 standardized protocol of the Genomic Wizard Purification Kit from Promega, as  
27  
28 83 previously reported<sup>22-24</sup>. The integrity of genetic material will be checked on 1%  
29  
30 84 agarose gels and quantified by spectrophotometry using the Nanodrop system.  
31  
32  
33 85

34  
35 86 The genotyping will be performed using the Infinium PsychArray BeadChip,  
36  
37 87 following the manufacturer's protocol<sup>25 26</sup>. This array contains approximately 580000  
38  
39 88 genetic variants, wherein include a set of genetic variants previously associated with  
40  
41  
42 89 a variety of psychiatric illnesses. All genotyping analyses will be performed at the  
43  
44 90 National Institute of Genomic Medicine (INMEGEN). For quality controls, we will  
45  
46 91 filter-out samples and variants with call rates lower than 98% and variants deviating  
47  
48 92 from Hardy-Weinberg equilibrium, with a chi-square p-value  $< 1 \times 10^{-6}$ . Gender  
49  
50 93 concordance will be performed based on heterozygosity of X and Y chromosomes.  
51  
52 94 All filtering processes will be done using the PLINK v1.9 software<sup>27</sup>. Then, we will  
53  
54 95 perform a multidimensional scaling (MDS) analysis in PLINK, all SNPs that pass  
55  
56  
57  
58  
59  
60

1  
2  
3 96 quality controls will be pruned and used to check population stratification in order to  
4  
5 97 evaluate the ancestry of the individuals included. After the MDS analysis, the first  
6  
7 98 five components will be used as covariates in the association analysis. MDS  
8  
9  
10 99 dimensions will be graphically represented using the “MDS-plot” option. After quality  
11  
12 100 control procedures, we will perform the imputation using reference panels provided  
13  
14 101 by the Haplotype Reference Consortium r.1.1; we will use the Michigan Imputation  
15  
16  
17 102 Server for the imputation<sup>28 29</sup>.

18  
19 103

#### 20 21 104 *Polygenic risk score calculation (PRS)*

22  
23 105 PRS is a measurement of genetic liability to schizophrenia, based on the  
24  
25 106 Psychiatric Genomics Consortium (PGC) schizophrenia GWAS<sup>30</sup>. SNPs will be  
26  
27  
28 107 selected and used in the PRS calculation based on p values obtained in the original  
29  
30 108 PGC GWAS using PRSice<sup>31</sup>. PRS will be performed to search for suicide attempt  
31  
32  
33 109 associations using linear regression models adjusted by age, sex, and four  
34  
35 110 multidimensional-scaling components (MDS). The estimation of gene- or set-based  
36  
37 111 association tests using GWAS summary data, will be performed using Genome-wide  
38  
39 112 Complex Trait Analysis (GCTA)<sup>32 33</sup>.

40  
41 113

#### 42 43 114 *Statistical analyses*

44  
45 115 In order to evaluate the effect of genetic variants on suicidal behavior, we will  
46  
47 116 perform two workflows: A) a classic GWAS analysis applying the same importance  
48  
49 117 to all the variants and B) algorithms for predicting deleteriousness of variants.  
50  
51 118 Concerning the first workflow, we will conduct a mixed linear model analysis on  
52  
53  
54 119 imputed variants with a minor allele frequency of 5%. The implementation of linear  
55  
56  
57  
58  
59  
60

1  
2  
3 120 mixed models will be performed using the GCTA software <sup>34</sup>. For the second  
4  
5 121 workflow, we will include the prediction of deliriousness of variants using different  
6  
7 122 prediction algorithms, such as PolyPhen, SIFT, CADD, VEP and ENCODE <sup>35-39</sup>.  
8  
9  
10 123 After the functional impact on variants prediction, we will compare cases' allele  
11  
12 124 frequency of loss-of-function, missense with deleterious effect, variants present in  
13  
14 125 regulatory regions and variants with a PHRED-CADD score higher than 20, with the  
15  
16 126 allele frequency of populations reported in the 1000 genomes and ExAC database.  
17  
18  
19 127 GWAS analysis will be performed on cases with history of suicide attempt and  
20  
21 128 compared with non-suicide attempters. Genome wide significance will be set at P  
22  
23  
24 129  $<5 \times 10^{-08}$ .

130

### 131 *Power analysis calculation*

132 For the GWAS analysis, we will perform power calculations using QUANTO 1.2.4  
133 (<http://biostats.usc.edu/software>). This analysis uses a log additive model of  
134 inheritance and is capable of detecting a power of 0.82 at significance threshold  
135  $5 \times 10^{-08}$  to detect an effect size of OR  $\geq 1.8$  with a  $P_0$  of 0.08 and MAF of 0.25, as  
136 observed in a previous study<sup>14</sup>. The  $P_0$  that we will use is the baseline risk of suicide  
137 attempt in our population based on previous reports <sup>40 41</sup>. Therefore, our study will  
138 be powered to detect genetics effects.

139

## 140 **Discussion**

141 Various situations and contexts have been proposed as predictors of suicidal  
142 behavior; among them, the presence of a psychiatric disorder seems to be an  
143 important determinant for such behavior. Likewise, the possible genetic

1  
2  
3 144 predisposition to manifest SB has been supported by several investigations, but the  
4  
5 145 understanding of the precise genetic system that causes such vulnerability to  
6  
7 146 suicidal tendencies is still largely incomplete. Hence, the principal aim of our protocol  
8  
9  
10 147 study is to explore the potential genetic influence on SB in a Mexican population,  
11  
12 148 throughout a genome-wide association study. In addition, we want to emphasize that  
13  
14 149 to our knowledge, this study protocol will be the first one to evaluate suicidal behavior  
15  
16  
17 150 in patients with schizophrenia and bipolar disorder in a Mexican population.

18  
19 151 The majority of genetic epidemiology evidence suggest that suicidal behavior  
20  
21 152 is a complex issue, where there are multiple genes that have a small effect over SB;  
22  
23 153 but if combined, could become predisposing factors. Therefore, association studies  
24  
25 154 that detect small effect contributions can be more useful, which is a strength of this  
26  
27 155 protocol. In this sense, one of the most powerful strengths of the GWAS is that it  
28  
29 156 uses many genetic markers across the whole genome to search for associations  
30  
31 157 with a particular disease; as it is based on no prior assumptions, it explores a large  
32  
33 158 number of genetic variants. For these reasons, we will use GWAS's results to  
34  
35 159 explore the genetic influence on suicidal behavior in schizophrenics with and without  
36  
37 160 SA, bipolar patients with and without SA, suicide attempters and healthy subjects as  
38  
39 161 controls. Therefore, the results of this study will provide information to better  
40  
41 162 comprehend the influence of the genetic background when developing suicidal  
42  
43 163 behavior, among psychiatric patients.

44  
45 164 Additionally, the findings of the present research could provide valuable information  
46  
47 165 for future researchers who attempt to identify genetic risk factors of suicidal behavior,  
48  
49 166 and help detect and/or treat this disease. Nowadays, there are microarrays that have  
50  
51 167 been used to study several genetic variables in Caucasian and Asian populations;  
52  
53  
54  
55  
56  
57  
58  
59  
60



1  
2  
3 168 to our knowledge however, there is no evidence reported of GWAS in studies that  
4  
5 169 evaluate suicidal behavior in psychiatric patients. Therefore, the outcomes of the  
6  
7 170 current protocol could provide essential information. The use of this type of genetic  
8  
9 171 tools will allow us to identify associated SNPs, missense and insertions and indels  
10  
11 172 in mental illnesses such as schizophrenia and bipolar disorder, as well as their  
12  
13  
14 173 possible participation as predictors of suicidal behavior in a Mexican population.  
15  
16  
17 174

18  
19 175 In conclusion, these findings could give important information to improve the design  
20  
21 176 of future chips for molecular diagnosis of psychiatric disorders in Mexicans, which  
22  
23 177 will be very useful in the prevention, diagnosis and prognosis of suicidal behavior in  
24  
25 178 Mexico. Moreover, the findings will give a better perspective of the genetic  
26  
27 179 background as a predictor of suicidal behavior in psychiatric diseases. Hence, the  
28  
29 180 outcomes would be useful in genetic research as well as in prevention and early  
30  
31 181 diagnosis of suicidal behavior in Mexicans  
32  
33  
34

35 182  
36  
37  
38  
39  
40  
41  
42  
43  
44  
45  
46  
47  
48  
49  
50  
51  
52  
53  
54  
55  
56  
57  
58  
59  
60

1  
2  
3 183 **Ethics and disseminations:**  
4

5 184 The study will be conducted in compliance with local regulations and internationally  
6  
7 185 established principles of the Declaration of Helsinki (59th General Assembly, Seoul,  
8  
9 186 Korea, October 2008). This study was approved by the ethics and investigation  
10  
11 187 committees of the National Institute of Genomic Medicine on July 22nd 2015, No.  
12  
13 188 CEI 215/13. Before inclusion, all patients are required to sign an informed consent  
14  
15 189 form.  
16  
17  
18

19  
20 190

21 191 **Consent for publication:**  
22

23 192 Not applicable.  
24  
25

26 193

27  
28 194 **Availability of data and material:**  
29

30 195 Available upon request from the corresponding author  
31  
32

33 196

34  
35 197 **Competing interest statement:**  
36

37 198 The authors declare to have no competing interests.  
38  
39

40 199

41  
42 200 **Funding statement:**  
43

44 201 This protocol will receive the support of INMEGEN project number 23/2015/I via  
45  
46 202 Humberto Nicolini.  
47  
48

49 203

50  
51 204 **Author contributions:**  
52

53 205 ADGM, HN and JJMM conceived the study, participated in its design, helped to draft  
54  
55 206 the manuscript and mentored TBGC. CATZ, ADGM and JJMM critically revised  
56  
57  
58  
59

1  
2  
3 207 successive drafts and provided important intellectual input. CATZ and TBGC  
4  
5 208 coordinated and supervised the integration of the manuscript. ES, IEJR, HN and  
6  
7 209 ADGM contributed to developing the analytic plan proposed for this study. All authors  
8  
9  
10 210 read and approved the final manuscript.

11  
12 211

## 13 14 212 **Acknowledgements**

15  
16  
17 213 The protocol study will be a doctoral thesis of TBGC.  
18  
19 214

20  
21 215

22  
23 216

24  
25 217

26  
27 218

28  
29 219

30  
31 220

32  
33 221

34  
35 222

36  
37 223

38  
39 224

40  
41 225

42  
43 226

44  
45 227

46  
47 228

48  
49 229

50  
51 230

52  
53  
54  
55  
56  
57  
58  
59  
60

231 **References**

- 232 1. Perlis RH, Huang J, Purcell S, et al. Genome-wide association study of suicide attempts in mood  
233 disorder patients. *The American journal of psychiatry* 2010;167(12):1499-507. doi:  
234 10.1176/appi.ajp.2010.10040541 [published Online First: 2010/11/03]
- 235 2. Pulay AJ, Rethelyi JM. Multimarker analysis suggests the involvement of BDNF signaling and  
236 microRNA biosynthesis in suicidal behavior. *American journal of medical genetics Part B,  
237 Neuropsychiatric genetics : the official publication of the International Society of Psychiatric  
238 Genetics* 2016;171(6):763-76. doi: 10.1002/ajmg.b.32433 [published Online First:  
239 2016/02/28]
- 240 3. Mullins N, Perroud N, Uher R, et al. Genetic relationships between suicide attempts, suicidal  
241 ideation and major psychiatric disorders: a genome-wide association and polygenic scoring  
242 study. *American journal of medical genetics Part B, Neuropsychiatric genetics : the official  
243 publication of the International Society of Psychiatric Genetics* 2014;165B(5):428-37. doi:  
244 10.1002/ajmg.b.32247 [published Online First: 2014/06/26]
- 245 4. Perroud N, Uher R, Ng MY, et al. Genome-wide association study of increasing suicidal ideation  
246 during antidepressant treatment in the GENDEP project. *Pharmacogenomics J*  
247 2012;12(1):68-77. doi: 10.1038/tpj.2010.70 [published Online First: 2010/09/30]
- 248 5. Stein MB, Ware EB, Mitchell C, et al. Genomewide association studies of suicide attempts in US  
249 soldiers. *American journal of medical genetics Part B, Neuropsychiatric genetics : the official  
250 publication of the International Society of Psychiatric Genetics* 2017;174(8):786-97. doi:  
251 10.1002/ajmg.b.32594 [published Online First: 2017/09/14]
- 252 6. Sokolowski M, Wasserman J, Wasserman D. Rare CNVs in Suicide Attempt include Schizophrenia-  
253 Associated Loci and Neurodevelopmental Genes: A Pilot Genome-Wide and Family-Based  
254 Study. *PloS one* 2016;11(12):e0168531. doi: 10.1371/journal.pone.0168531 [published  
255 Online First: 2016/12/29]
- 256 7. Levine SZ, Goldberg Y, Yoffe R, et al. Suicide attempts in a national population of twins concordant  
257 for psychoses. *European neuropsychopharmacology : the journal of the European College of  
258 Neuropsychopharmacology* 2014;24(8):1203-9. doi: 10.1016/j.euroneuro.2014.05.014  
259 [published Online First: 2014/06/28]
- 260 8. Linker J, Gillespie NA, Maes H, et al. Suicidal ideation, depression, and conduct disorder in a  
261 sample of adolescent and young adult twins. *Suicide & life-threatening behavior*  
262 2012;42(4):426-36. doi: 10.1111/j.1943-278X.2012.00101.x [published Online First:  
263 2012/06/01]
- 264 9. Petersen L, Sorensen TI, Kragh Andersen P, et al. Genetic and familial environmental effects on  
265 suicide attempts: a study of Danish adoptees and their biological and adoptive siblings.  
266 *Journal of affective disorders* 2014;155:273-7. doi: 10.1016/j.jad.2013.11.012 [published  
267 Online First: 2013/12/05]
- 268 10. Roy A, Rylander G, Sarchiapone M. Genetics of suicides. Family studies and molecular genetics.  
269 *Annals of the New York Academy of Sciences* 1997;836:135-57. [published Online First:  
270 1998/06/09]
- 271 11. Mirkovic B, Cohen D, Laurent C, et al. A case-control association study of 12 candidate genes and  
272 attempted suicide in French adolescents. *International journal of adolescent medicine and  
273 health* 2017 doi: 10.1515/ijamh-2017-0089 [published Online First: 2017/09/14]
- 274 12. Tombacz D, Maroti Z, Kalmar T, et al. High-Coverage Whole-Exome Sequencing Identifies  
275 Candidate Genes for Suicide in Victims with Major Depressive Disorder. *Scientific reports*  
276 2017;7(1):7106. doi: 10.1038/s41598-017-06522-3 [published Online First: 2017/08/05]

- 1  
2  
3 277 13. Gross JA, Bureau A, Croteau J, et al. A genome-wide copy number variant study of suicidal  
4 278 behavior. *PloS one* 2015;10(5):e0128369. doi: 10.1371/journal.pone.0128369 [published  
5 279 Online First: 2015/05/27]  
6 280 14. Galfalvy H, Haghghi F, Hodgkinson C, et al. A genome-wide association study of suicidal  
7 281 behavior. *American journal of medical genetics Part B, Neuropsychiatric genetics : the  
8 282 official publication of the International Society of Psychiatric Genetics* 2015;168(7):557-63.  
9 283 doi: 10.1002/ajmg.b.32330 [published Online First: 2015/06/17]  
10 284 15. Galfalvy H, Zalsman G, Huang YY, et al. A pilot genome wide association and gene expression  
11 285 array study of suicide with and without major depression. *The world journal of biological  
12 286 psychiatry : the official journal of the World Federation of Societies of Biological Psychiatry*  
13 287 2013;14(8):574-82. doi: 10.3109/15622975.2011.597875 [published Online First:  
14 288 2011/11/09]  
15 289 16. Laje G, Allen AS, Akula N, et al. Genome-wide association study of suicidal ideation emerging  
16 290 during citalopram treatment of depressed outpatients. *Pharmacogenet Genomics*  
17 291 2009;19(9):666-74. doi: 10.1097/FPC.0b013e32832e4bcd [published Online First:  
18 292 2009/09/03]  
19 293 17. Zai CC, Goncalves VF, Tiwari AK, et al. A genome-wide association study of suicide severity scores  
20 294 in bipolar disorder. *Journal of psychiatric research* 2015;65:23-9. doi:  
21 295 10.1016/j.jpsychires.2014.11.002 [published Online First: 2015/04/29]  
22 296 18. Menke A, Domschke K, Czamara D, et al. Genome-wide association study of antidepressant  
23 297 treatment-emergent suicidal ideation. *Neuropsychopharmacology : official publication of  
24 298 the American College of Neuropsychopharmacology* 2012;37(3):797-807. doi:  
25 299 10.1038/npp.2011.257 [published Online First: 2011/10/28]  
26 300 19. Bani-Fatemi A, Graff A, Zai C, et al. GWAS analysis of suicide attempt in schizophrenia: Main  
27 301 genetic effect and interaction with early life trauma. *Neurosci Lett* 2016;622:102-6. doi:  
28 302 10.1016/j.neulet.2016.04.043 [published Online First: 2016/04/26]  
29 303 20. Schosser A, Butler AW, Ising M, et al. Genomewide association scan of suicidal thoughts and  
30 304 behaviour in major depression. *PloS one* 2011;6(7):e20690. doi:  
31 305 10.1371/journal.pone.0020690 [published Online First: 2011/07/14]  
32 306 21. Willour VL, Seifuddin F, Mahon PB, et al. A genome-wide association study of attempted suicide.  
33 307 *Molecular psychiatry* 2012;17(4):433-44. doi: 10.1038/mp.2011.4 [published Online First:  
34 308 2011/03/23]  
35 309 22. Gonzalez-Castro TB, Nicolini H, Lanzagorta N, et al. The role of brain-derived neurotrophic factor  
36 310 (BDNF) Val66Met genetic polymorphism in bipolar disorder: a case-control study,  
37 311 comorbidities, and meta-analysis of 16,786 subjects. *Bipolar disorders* 2015;17(1):27-38.  
38 312 doi: 10.1111/bdi.12227 [published Online First: 2014/07/22]  
39 313 23. Gonzalez-Castro TB, Tovilla-Zarate C, Juarez-Rojop I, et al. Association of the 5HTR2A gene with  
40 314 suicidal behavior: case-control study and updated meta-analysis. *BMC psychiatry*  
41 315 2013;13:25. doi: 10.1186/1471-244x-13-25 [published Online First: 2013/01/15]  
42 316 24. Gonzalez-Castro TB, Tovilla-Zarate CA, Juarez-Rojop I, et al. Association of 5HTR1A gene variants  
43 317 with suicidal behavior: case-control study and updated meta-analysis. *Journal of psychiatric  
44 318 research* 2013;47(11):1665-72. doi: 10.1016/j.jpsychires.2013.04.011 [published Online  
45 319 First: 2013/08/06]  
46 320 25. Guo Y, He J, Zhao S, et al. Illumina human exome genotyping array clustering and quality control.  
47 321 *Nature protocols* 2014;9(11):2643-62. doi: 10.1038/nprot.2014.174 [published Online First:  
48 322 2014/10/17]  
49 323 26. Borges G, Orozco R, Medina Mora ME. [Risk index for attempted suicide in Mexico]. *Salud publica  
50 324 de Mexico* 2012;54(6):595-606. [published Online First: 2013/01/16]

- 1  
2  
3 325 27. Chang CC, Chow CC, Tellier LC, et al. Second-generation PLINK: rising to the challenge of larger  
4 326 and richer datasets. *GigaScience* 2015;4:7. doi: 10.1186/s13742-015-0047-8 [published  
5 327 Online First: 2015/02/28]  
6 328 28. Loh PR, Danecek P, Palamara PF, et al. Reference-based phasing using the Haplotype Reference  
7 329 Consortium panel. *Nat Genet* 2016;48(11):1443-48. doi: 10.1038/ng.3679 [published Online  
8 330 First: 2016/10/28]  
9 331 29. McCarthy S, Das S, Kretzschmar W, et al. A reference panel of 64,976 haplotypes for genotype  
10 332 imputation. *Nat Genet* 2016;48(10):1279-83. doi: 10.1038/ng.3643 [published Online First:  
11 333 2016/08/23]  
12 334 30. Biological insights from 108 schizophrenia-associated genetic loci. *Nature* 2014;511(7510):421-  
13 335 7. doi: 10.1038/nature13595 [published Online First: 2014/07/25]  
14 336 31. Euesden J, Lewis CM, O'Reilly PF. PRSice: Polygenic Risk Score software. *Bioinformatics*  
15 337 2015;31(9):1466-8. doi: 10.1093/bioinformatics/btu848 [published Online First:  
16 338 2015/01/01]  
17 339 32. Yang J, Lee SH, Goddard ME, et al. GCTA: a tool for genome-wide complex trait analysis. *Am J*  
18 340 *Hum Genet* 2011;88(1):76-82. doi: 10.1016/j.ajhg.2010.11.011 [published Online First:  
19 341 2010/12/21]  
20 342 33. Bakshi A, Zhu Z, Vinkhuyzen AA, et al. Fast set-based association analysis using summary data  
21 343 from GWAS identifies novel gene loci for human complex traits. *Sci Rep* 2016;6:32894. doi:  
22 344 10.1038/srep32894 [published Online First: 2016/09/09]  
23 345 34. Yang J, Lee SH, Goddard ME, et al. Genome-wide complex trait analysis (GCTA): methods, data  
24 346 analyses, and interpretations. *Methods in molecular biology (Clifton, NJ)* 2013;1019:215-36.  
25 347 doi: 10.1007/978-1-62703-447-0\_9 [published Online First: 2013/06/13]  
26 348 35. Adzhubei I, Jordan DM, Sunyaev SR. Predicting functional effect of human missense mutations  
27 349 using PolyPhen-2. *Current protocols in human genetics* 2013;Chapter 7:Unit7.20. doi:  
28 350 10.1002/0471142905.hg0720s76 [published Online First: 2013/01/15]  
29 351 36. Ng PC, Henikoff S. Predicting deleterious amino acid substitutions. *Genome research*  
30 352 2001;11(5):863-74. doi: 10.1101/gr.176601 [published Online First: 2001/05/05]  
31 353 37. McLaren W, Gil L, Hunt SE, et al. The Ensembl Variant Effect Predictor. *Genome biology*  
32 354 2016;17(1):122. doi: 10.1186/s13059-016-0974-4 [published Online First: 2016/06/09]  
33 355 38. An integrated encyclopedia of DNA elements in the human genome. *Nature* 2012;489(7414):57-  
34 356 74. doi: 10.1038/nature11247 [published Online First: 2012/09/08]  
35 357 39. Kircher M, Witten DM, Jain P, et al. A general framework for estimating the relative  
36 358 pathogenicity of human genetic variants. 2014;46(3):310-5. doi: 10.1038/ng.2892  
37 359 40. Romero-Pimentel AL, Mendoza-Morales RC, Fresan A, et al. Demographic and Clinical  
38 360 Characteristics of Completed Suicides in Mexico City 2014-2015. *Front Psychiatry*  
39 361 2018;9:402. doi: 10.3389/fpsy.2018.00402 [published Online First: 2018/09/25]  
40 362 41. Bachmann S. Epidemiology of Suicide and the Psychiatric Perspective. *International journal of*  
41 363 *environmental research and public health* 2018;15(7) doi: 10.3390/ijerph15071425  
42 364 [published Online First: 2018/07/11]  
43  
44  
45  
46  
47  
48 365  
49  
50  
51  
52  
53  
54  
55  
56  
57  
58  
59  
60
